# Supplementary material for: Total synthesis of clavaminol A, C and H
Source: Royal Society of Chemistry journal article supplement (doi:10.1039/c1ob06060k), 2011-01-01

**Supporting Information for:**

**Total Synthesis of Clavaminol A, C and H**

Ahmed M. Zaed and Andrew Sutherland\*

*WestCHEM, School of Chemistry, The Joseph Black Building, University of Glasgow, Glasgow, UK  
G12 8QQ. Email: Andrew.Sutherland@glasgow.ac.uk*

**Table of Contents**

|                                                                 |        |
|-----------------------------------------------------------------|--------|
| <sup>1</sup> H NMR and <sup>13</sup> C NMR Spectra of Compounds | S2–S31 |
|-----------------------------------------------------------------|--------|

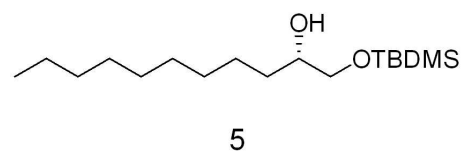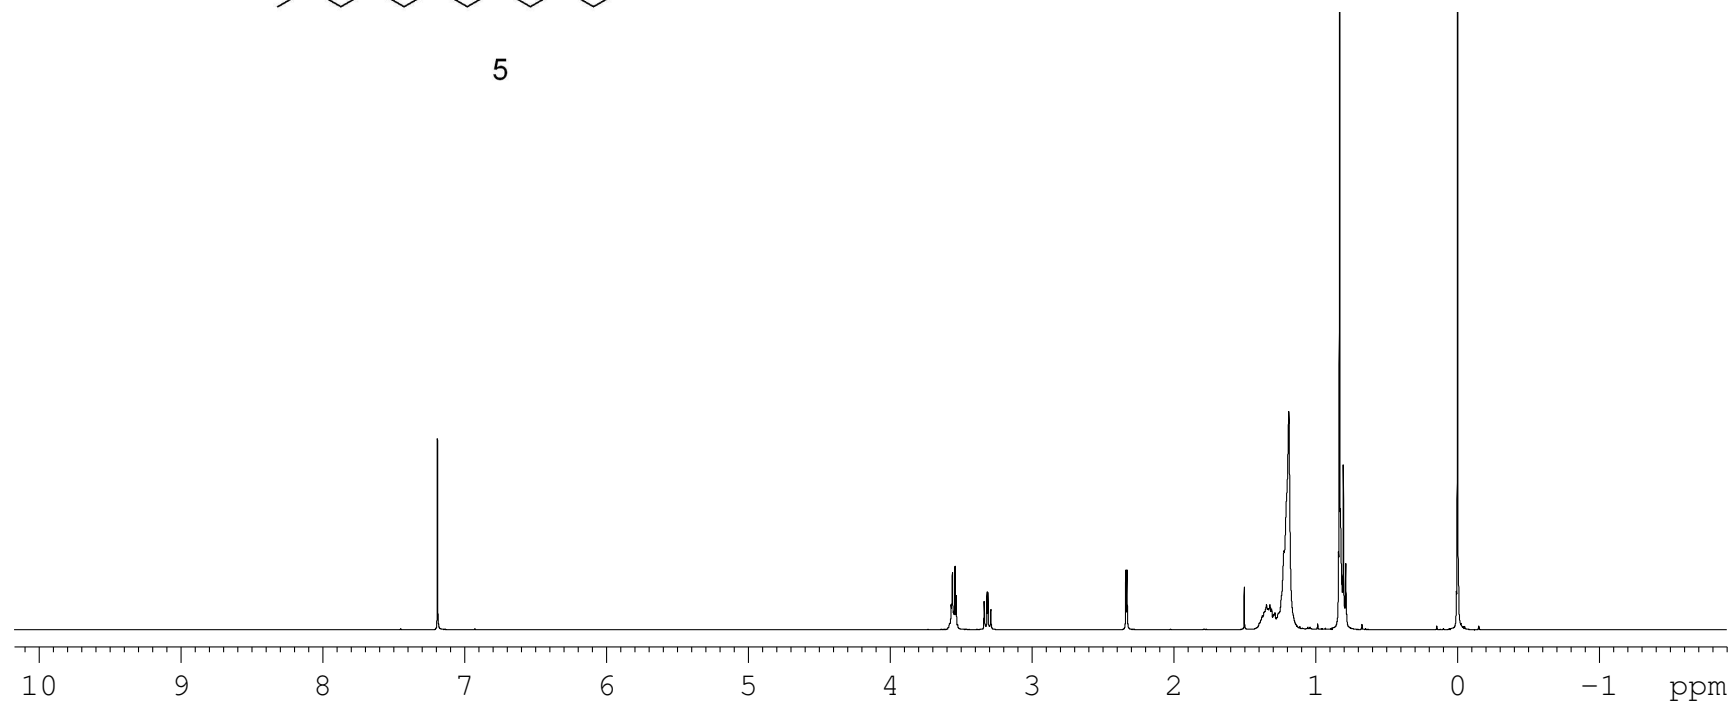

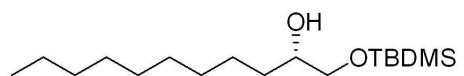

5

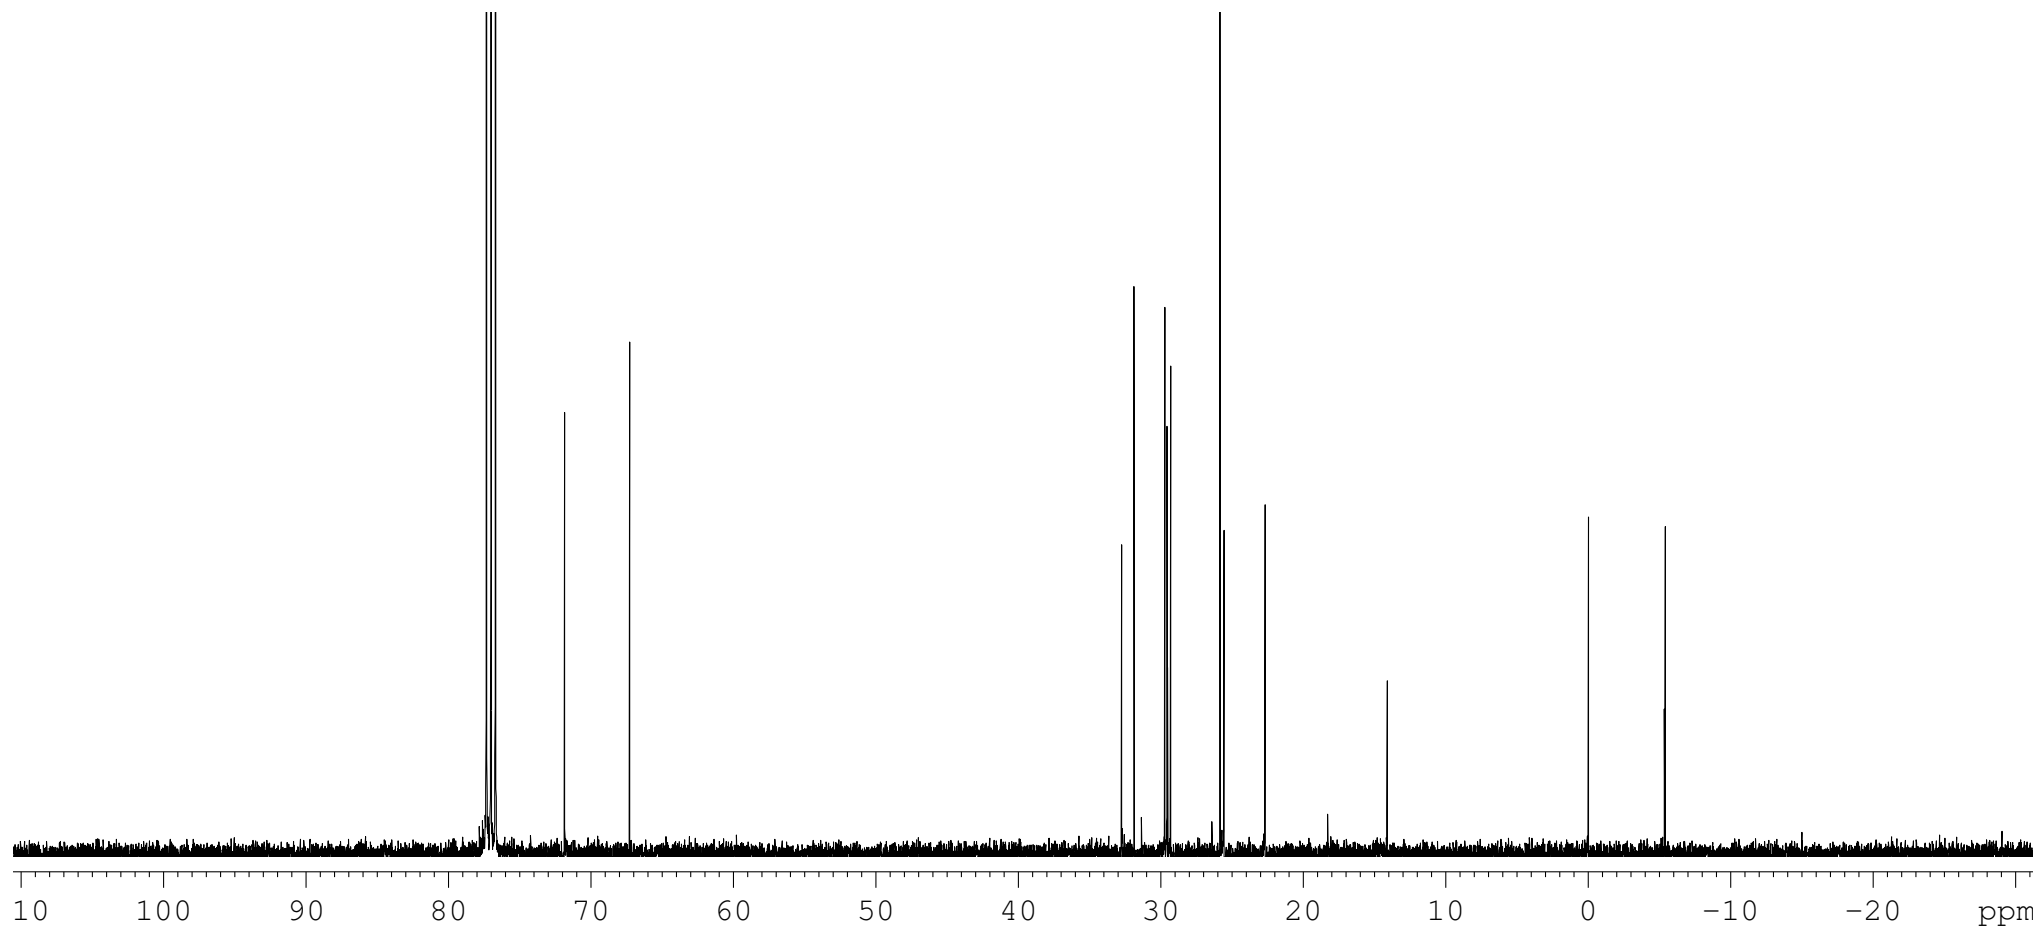

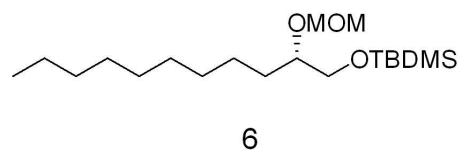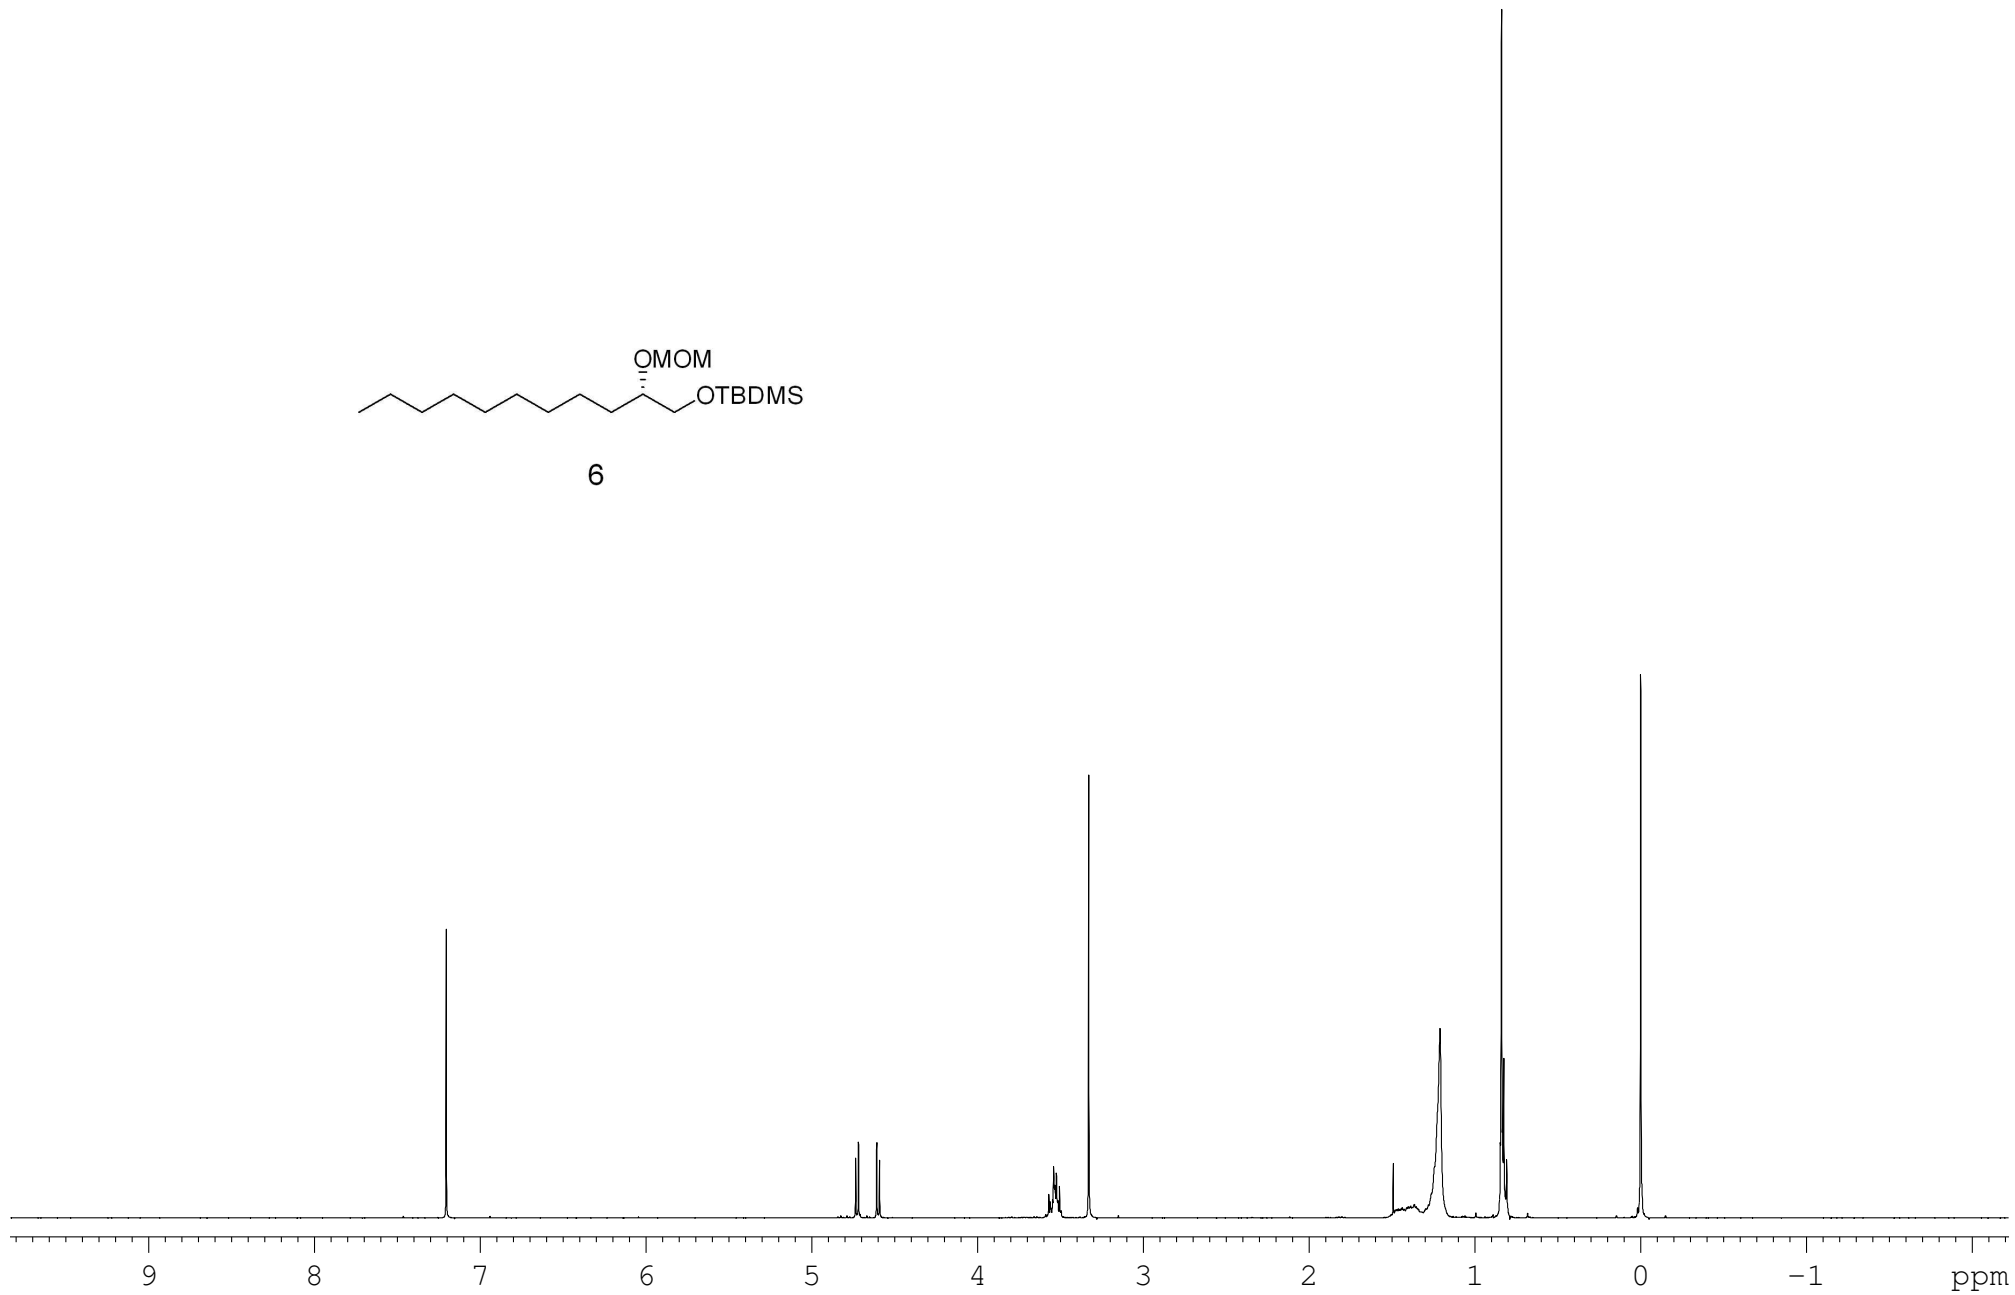

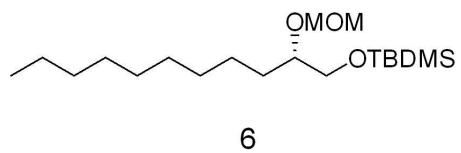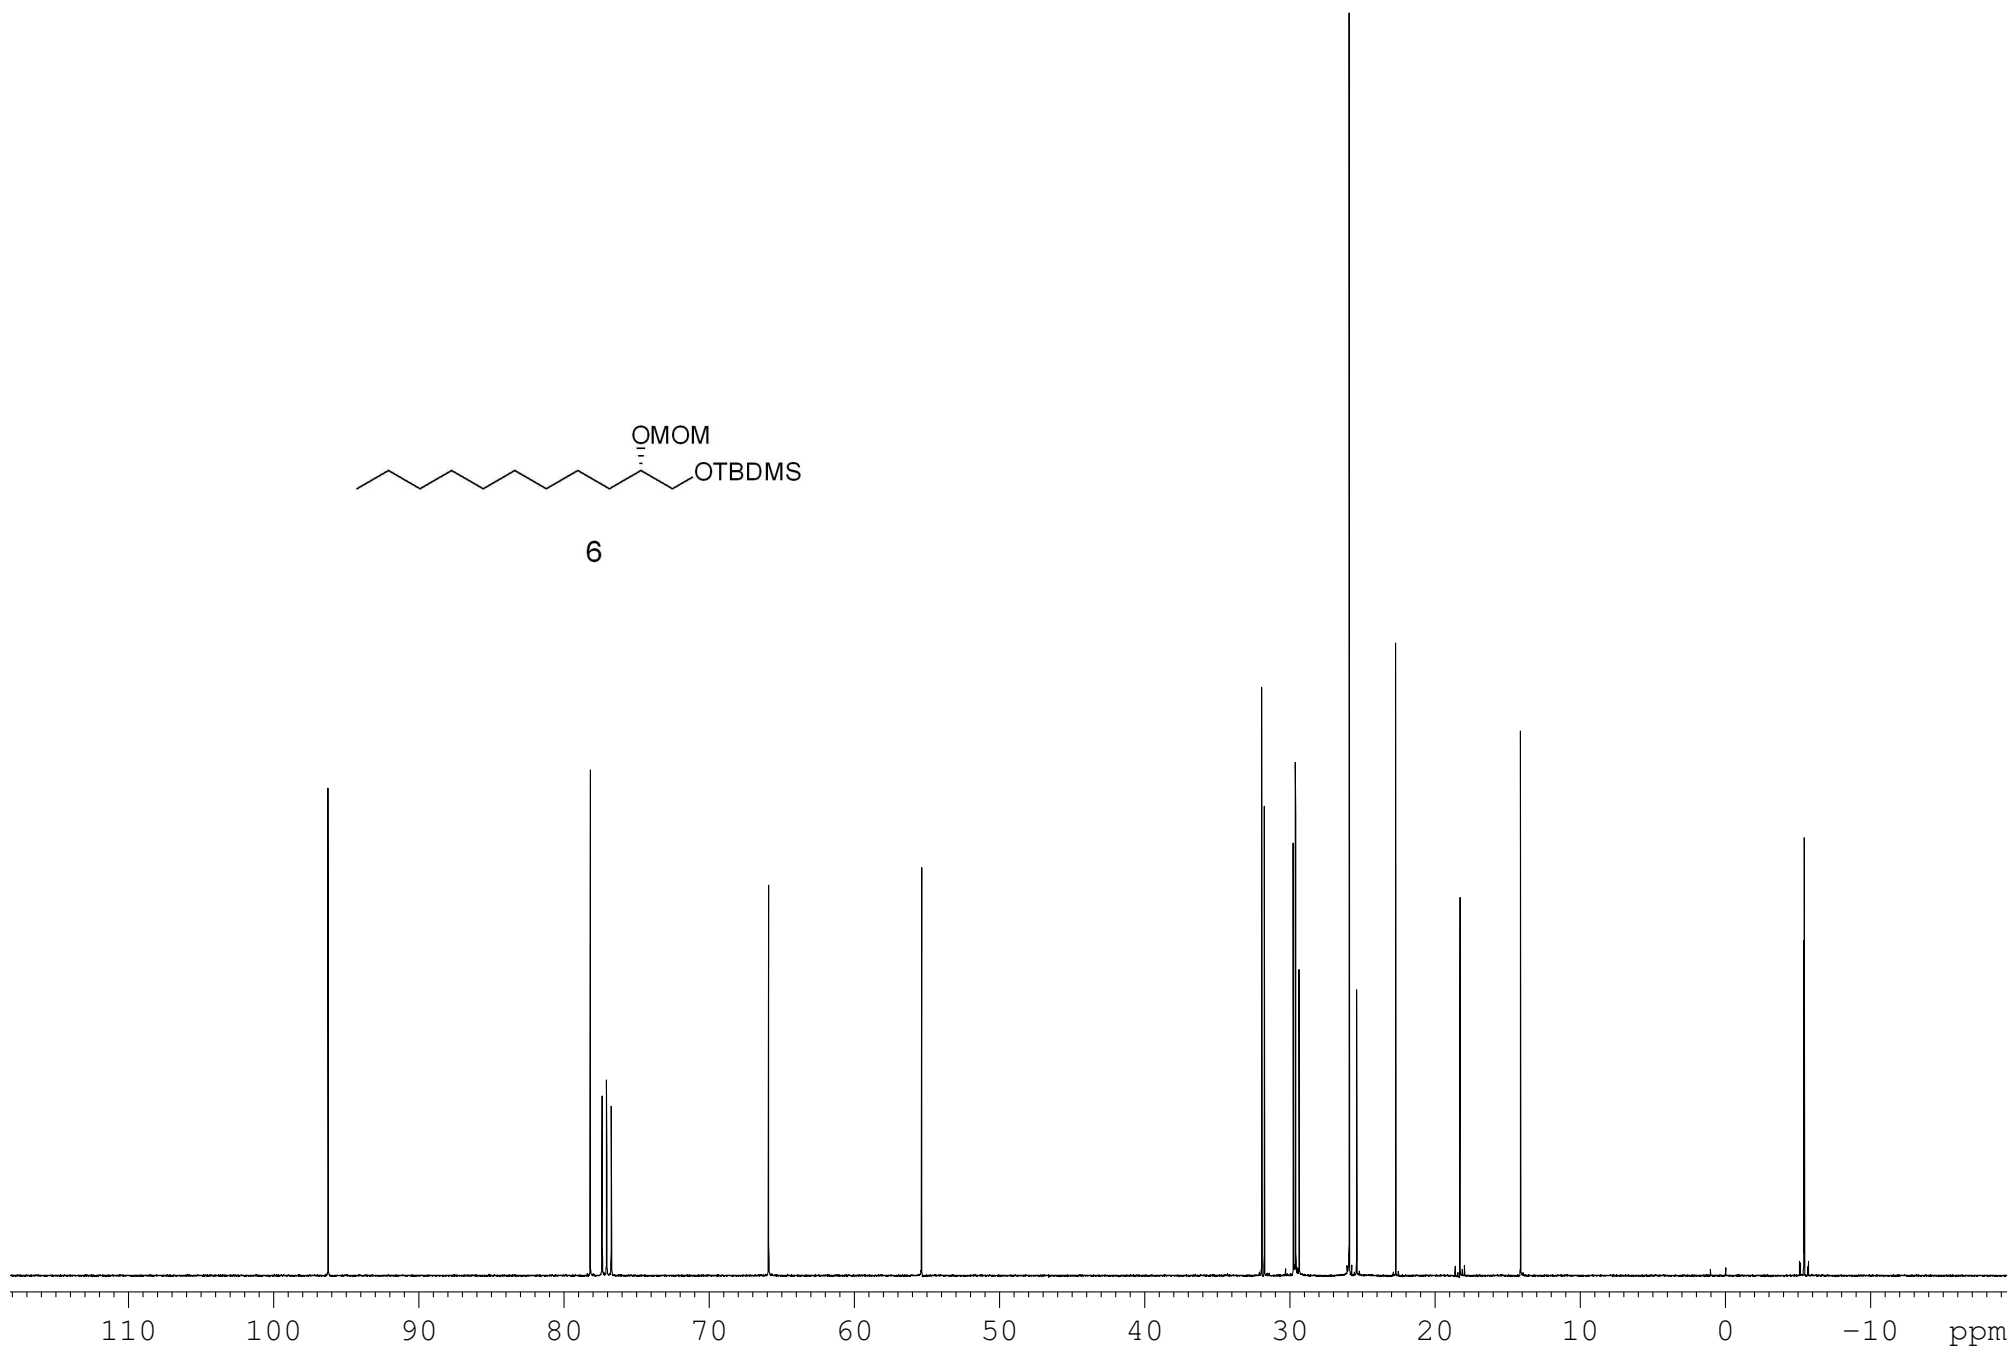

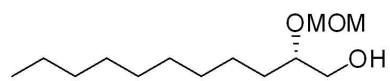

7

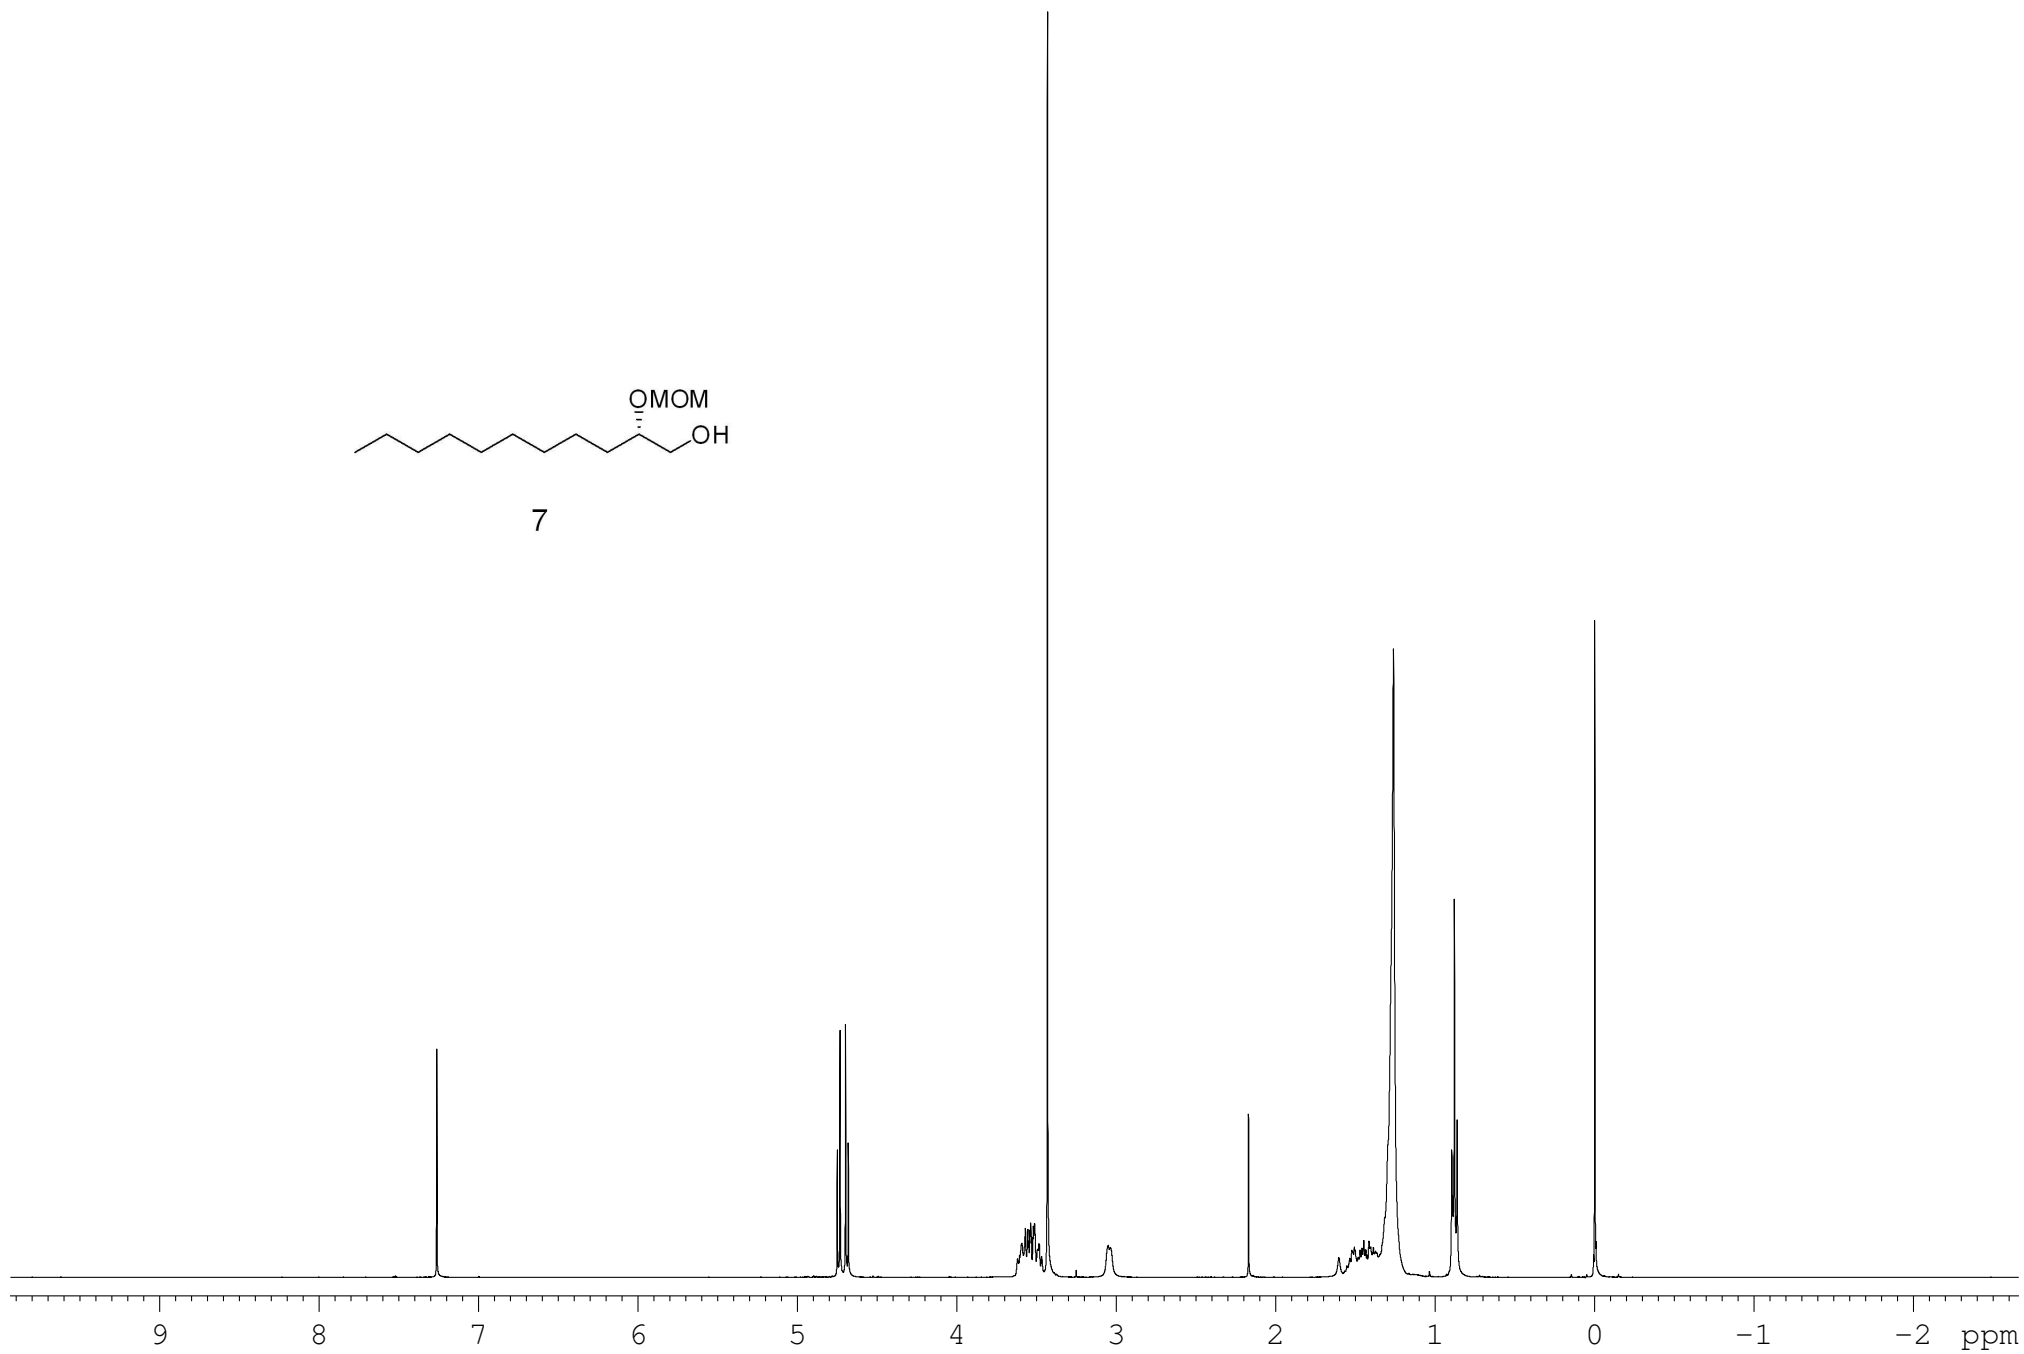

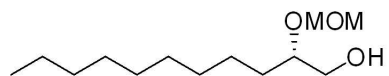

7

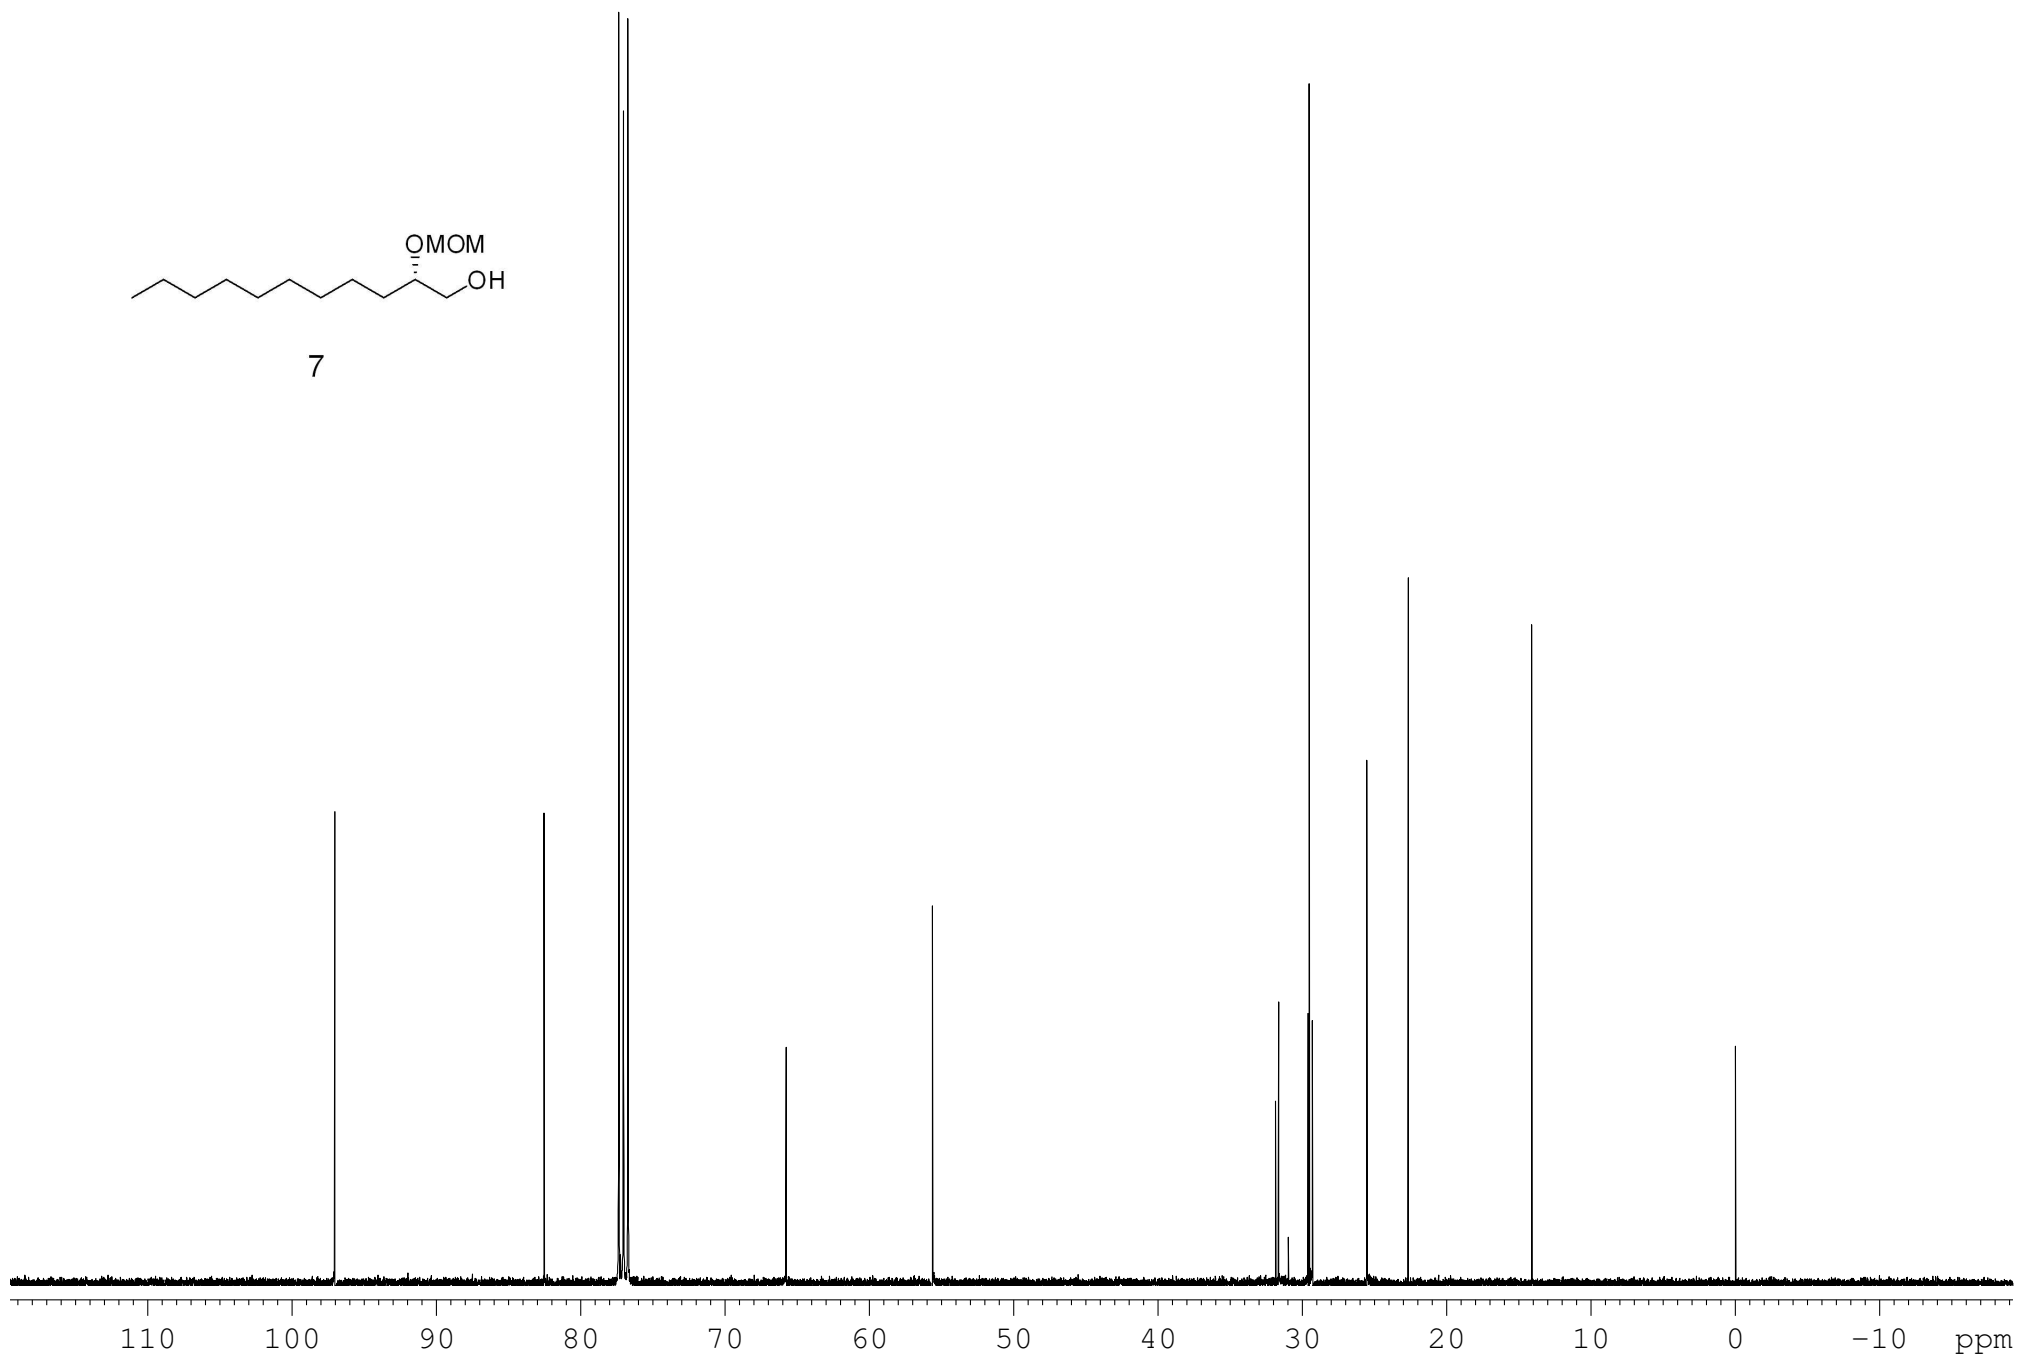

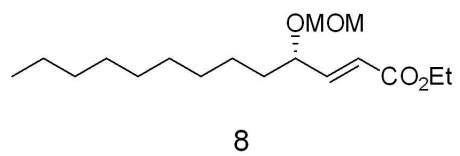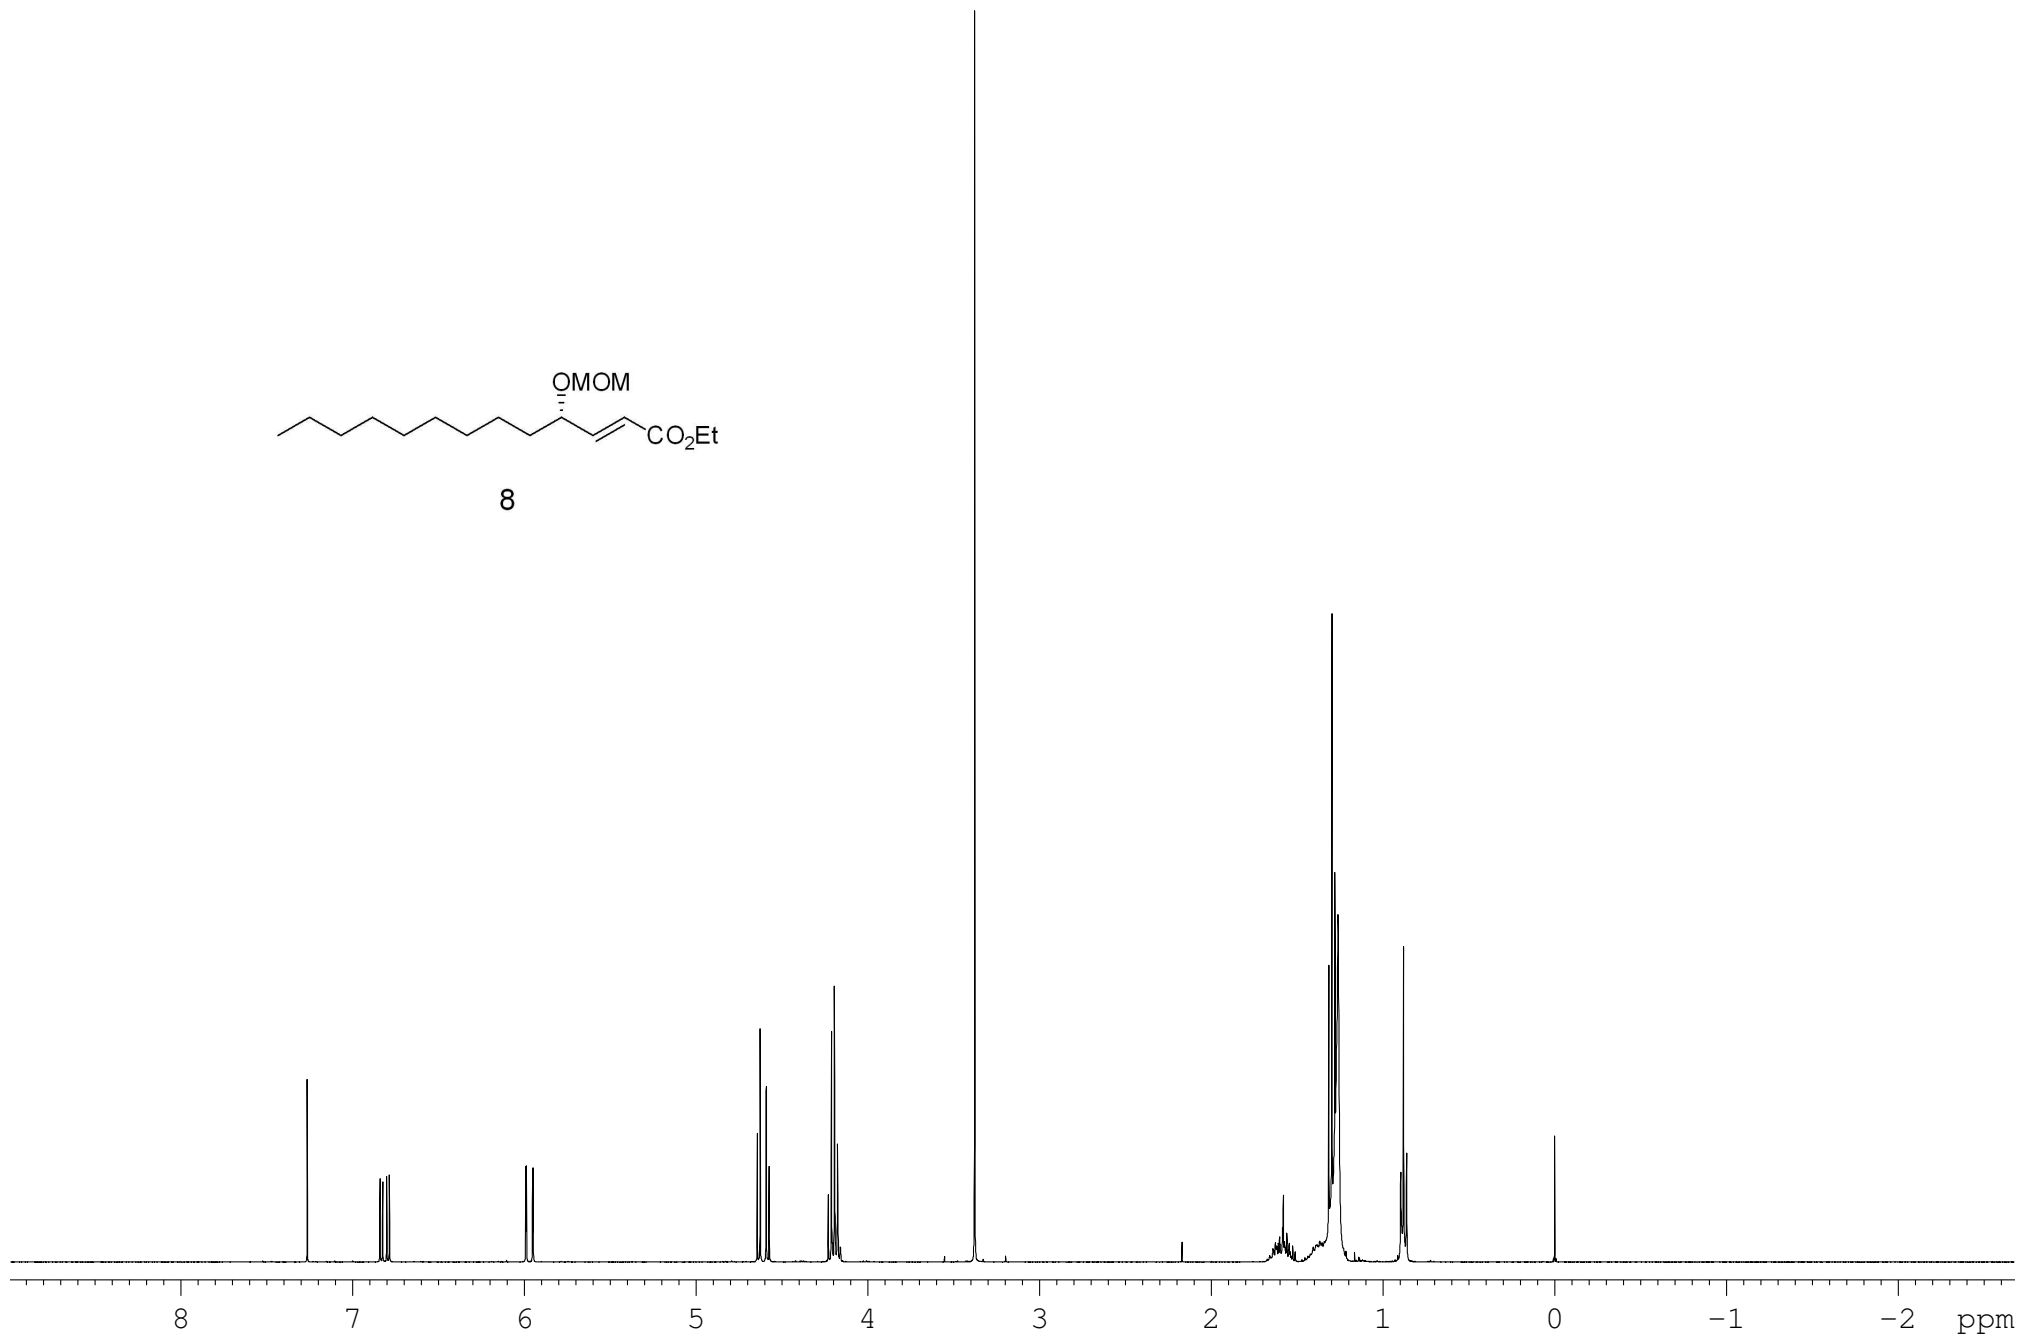



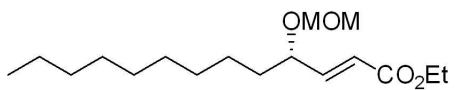

8

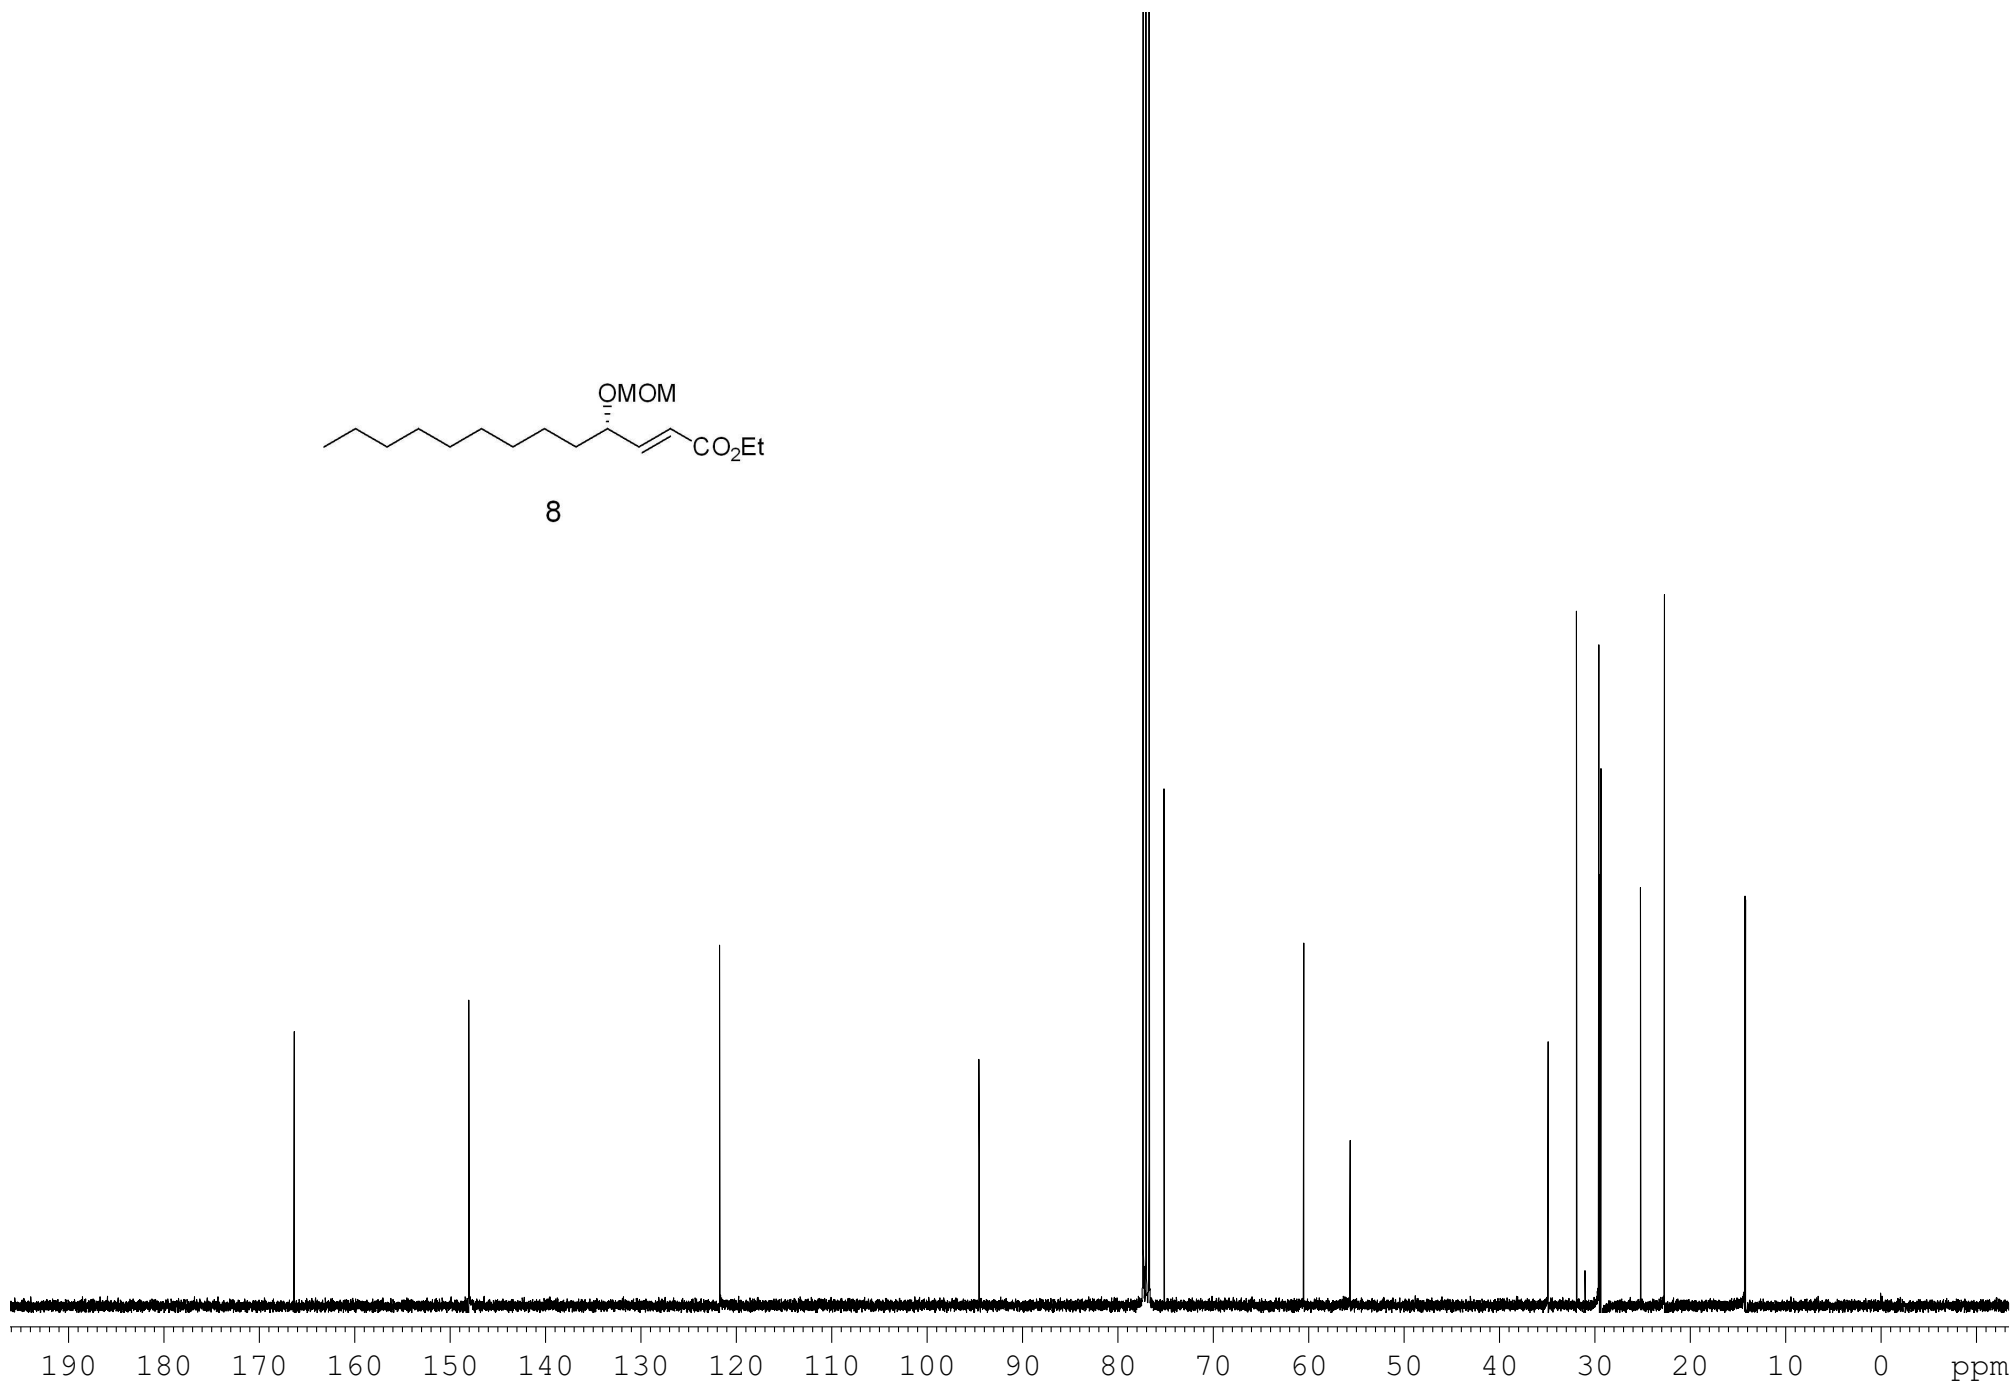

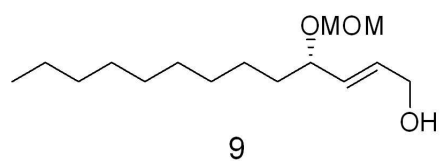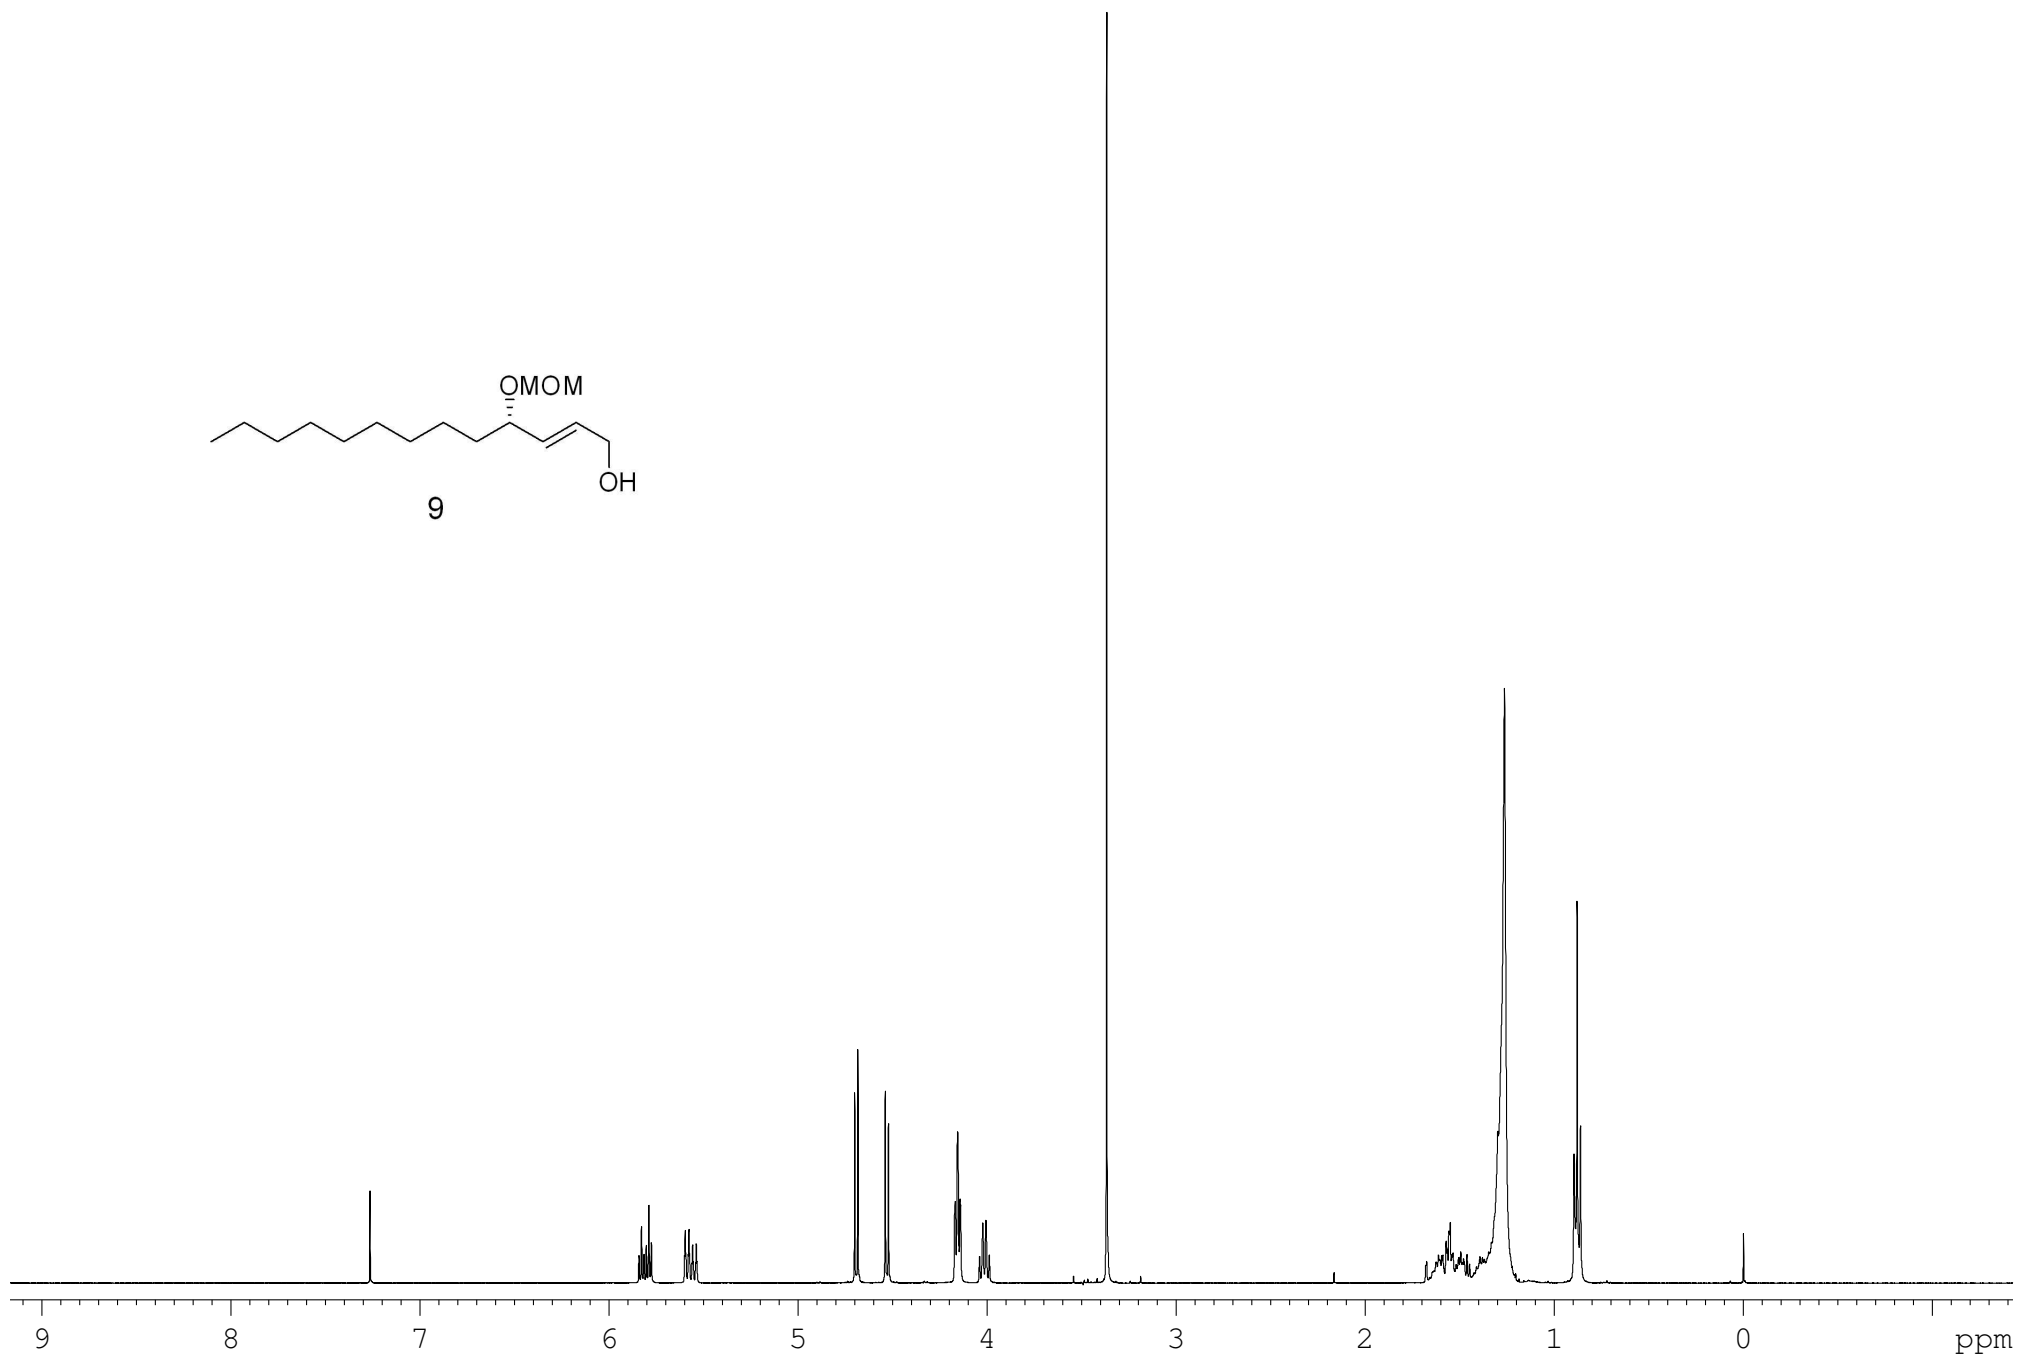

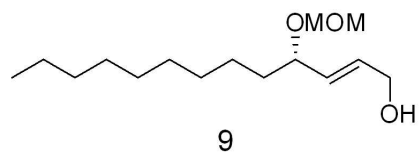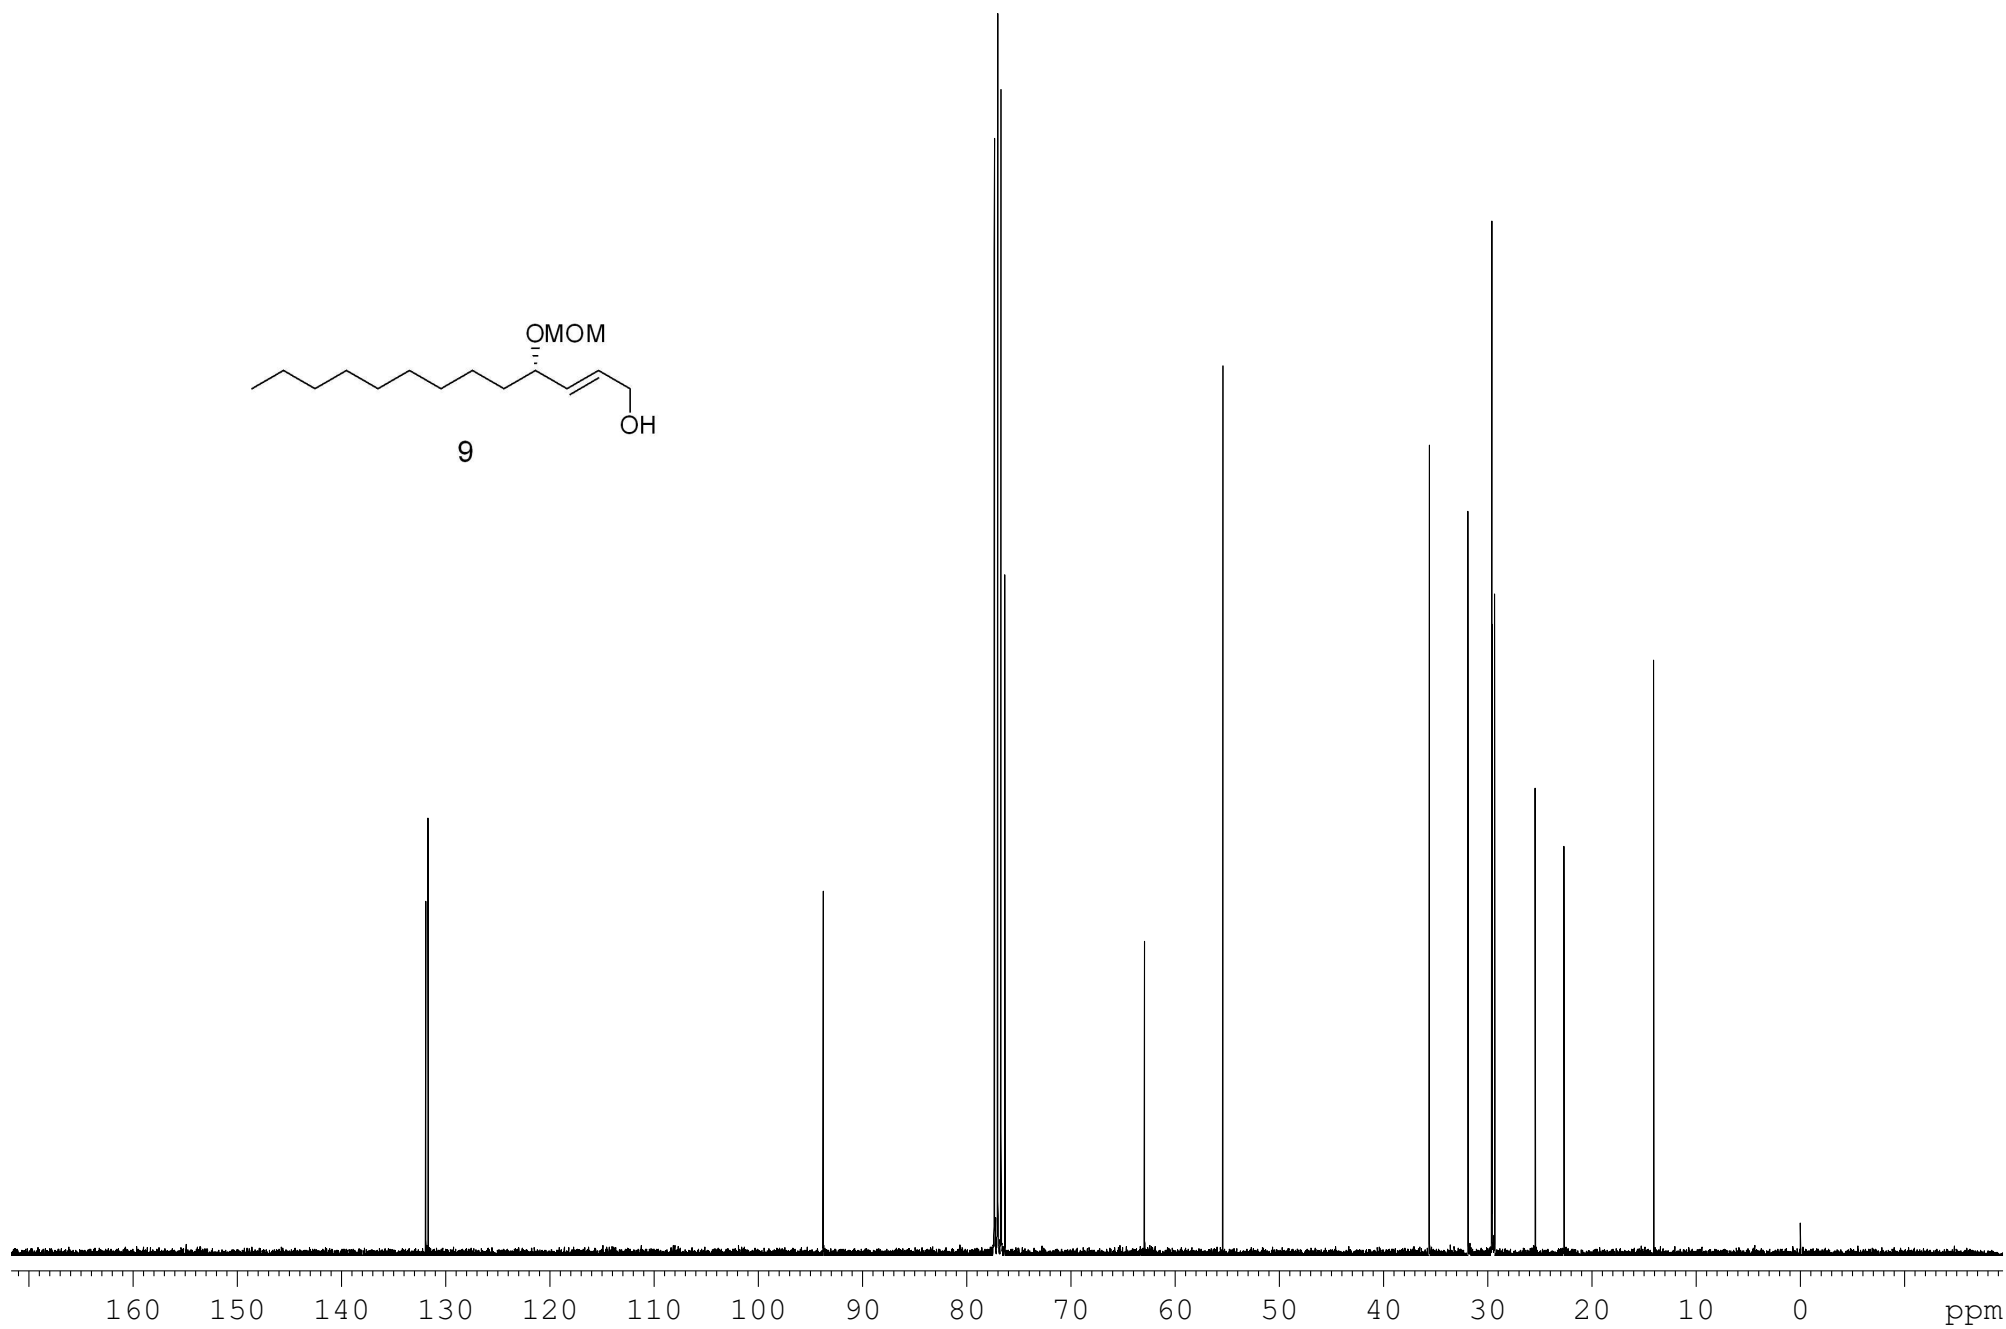

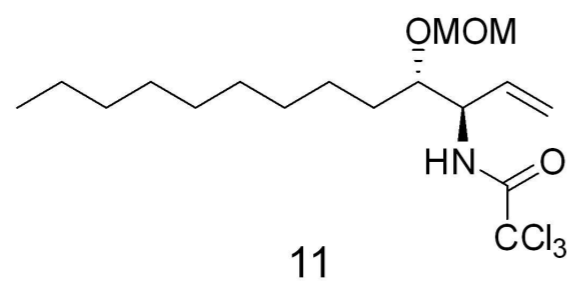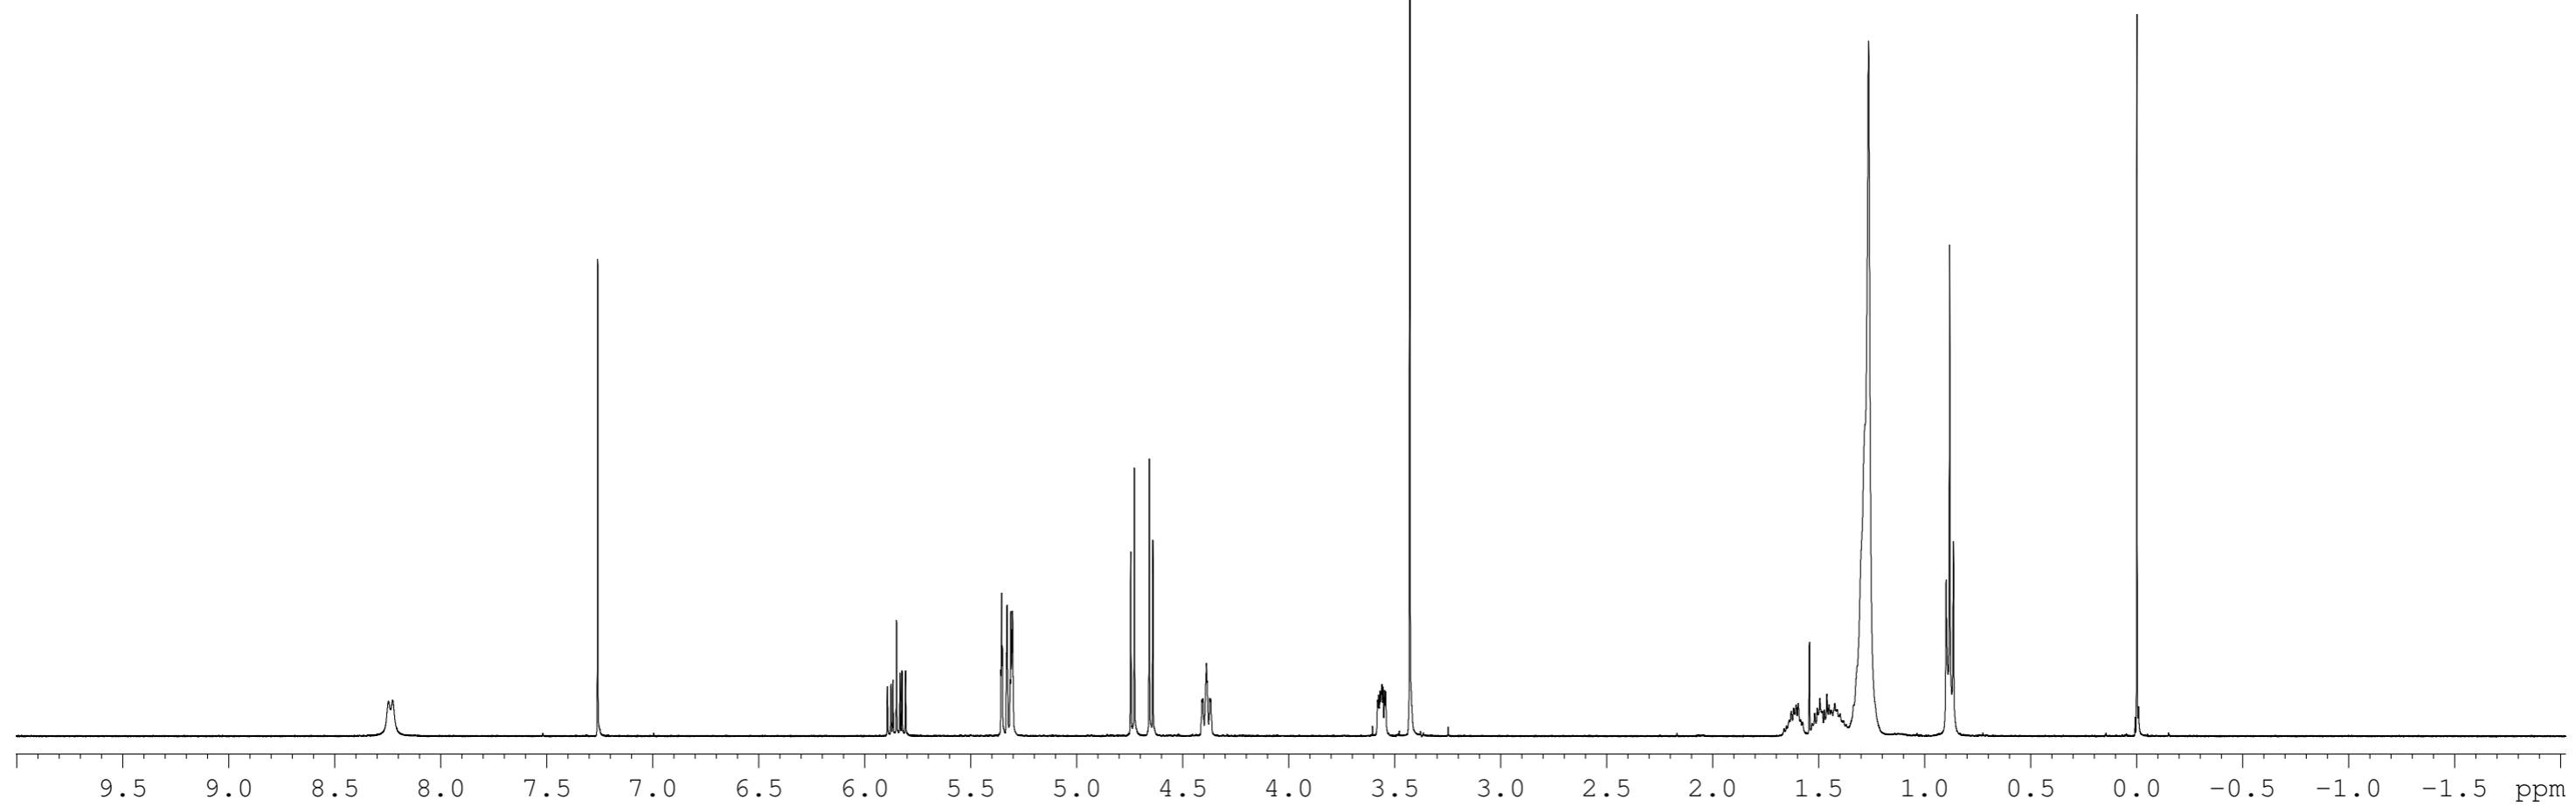

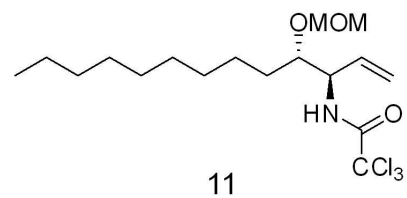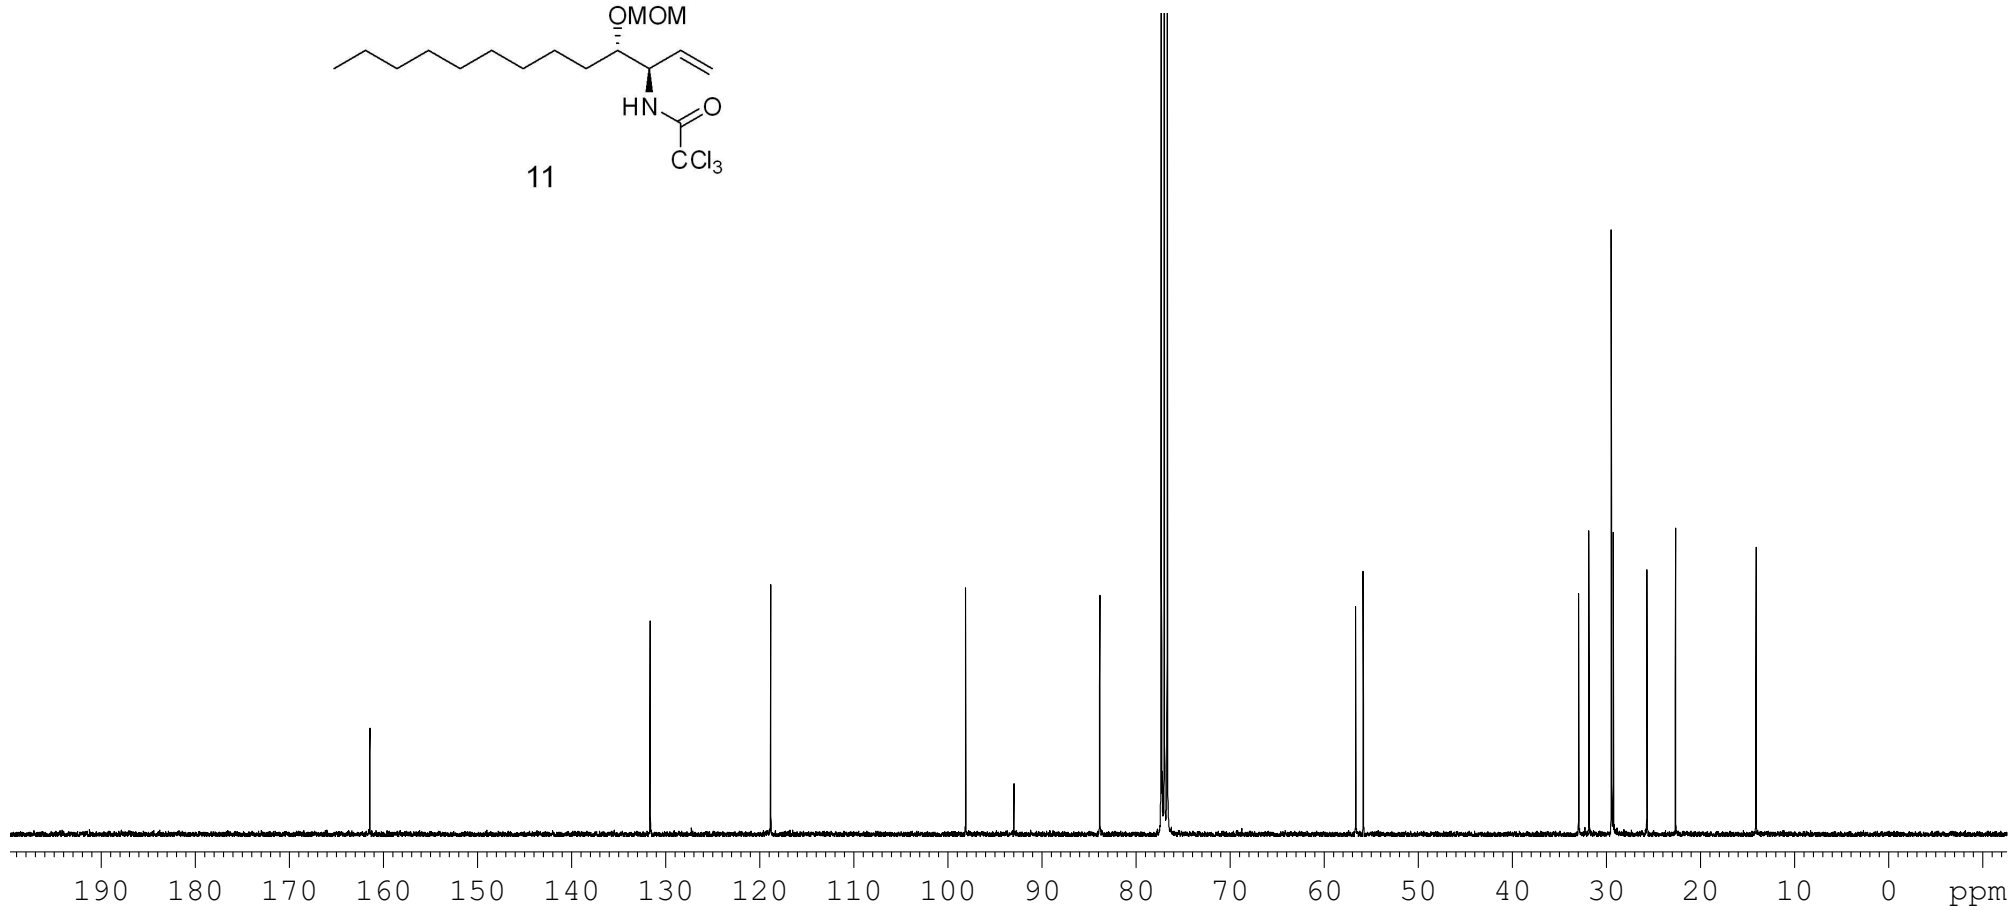

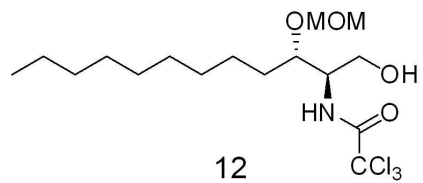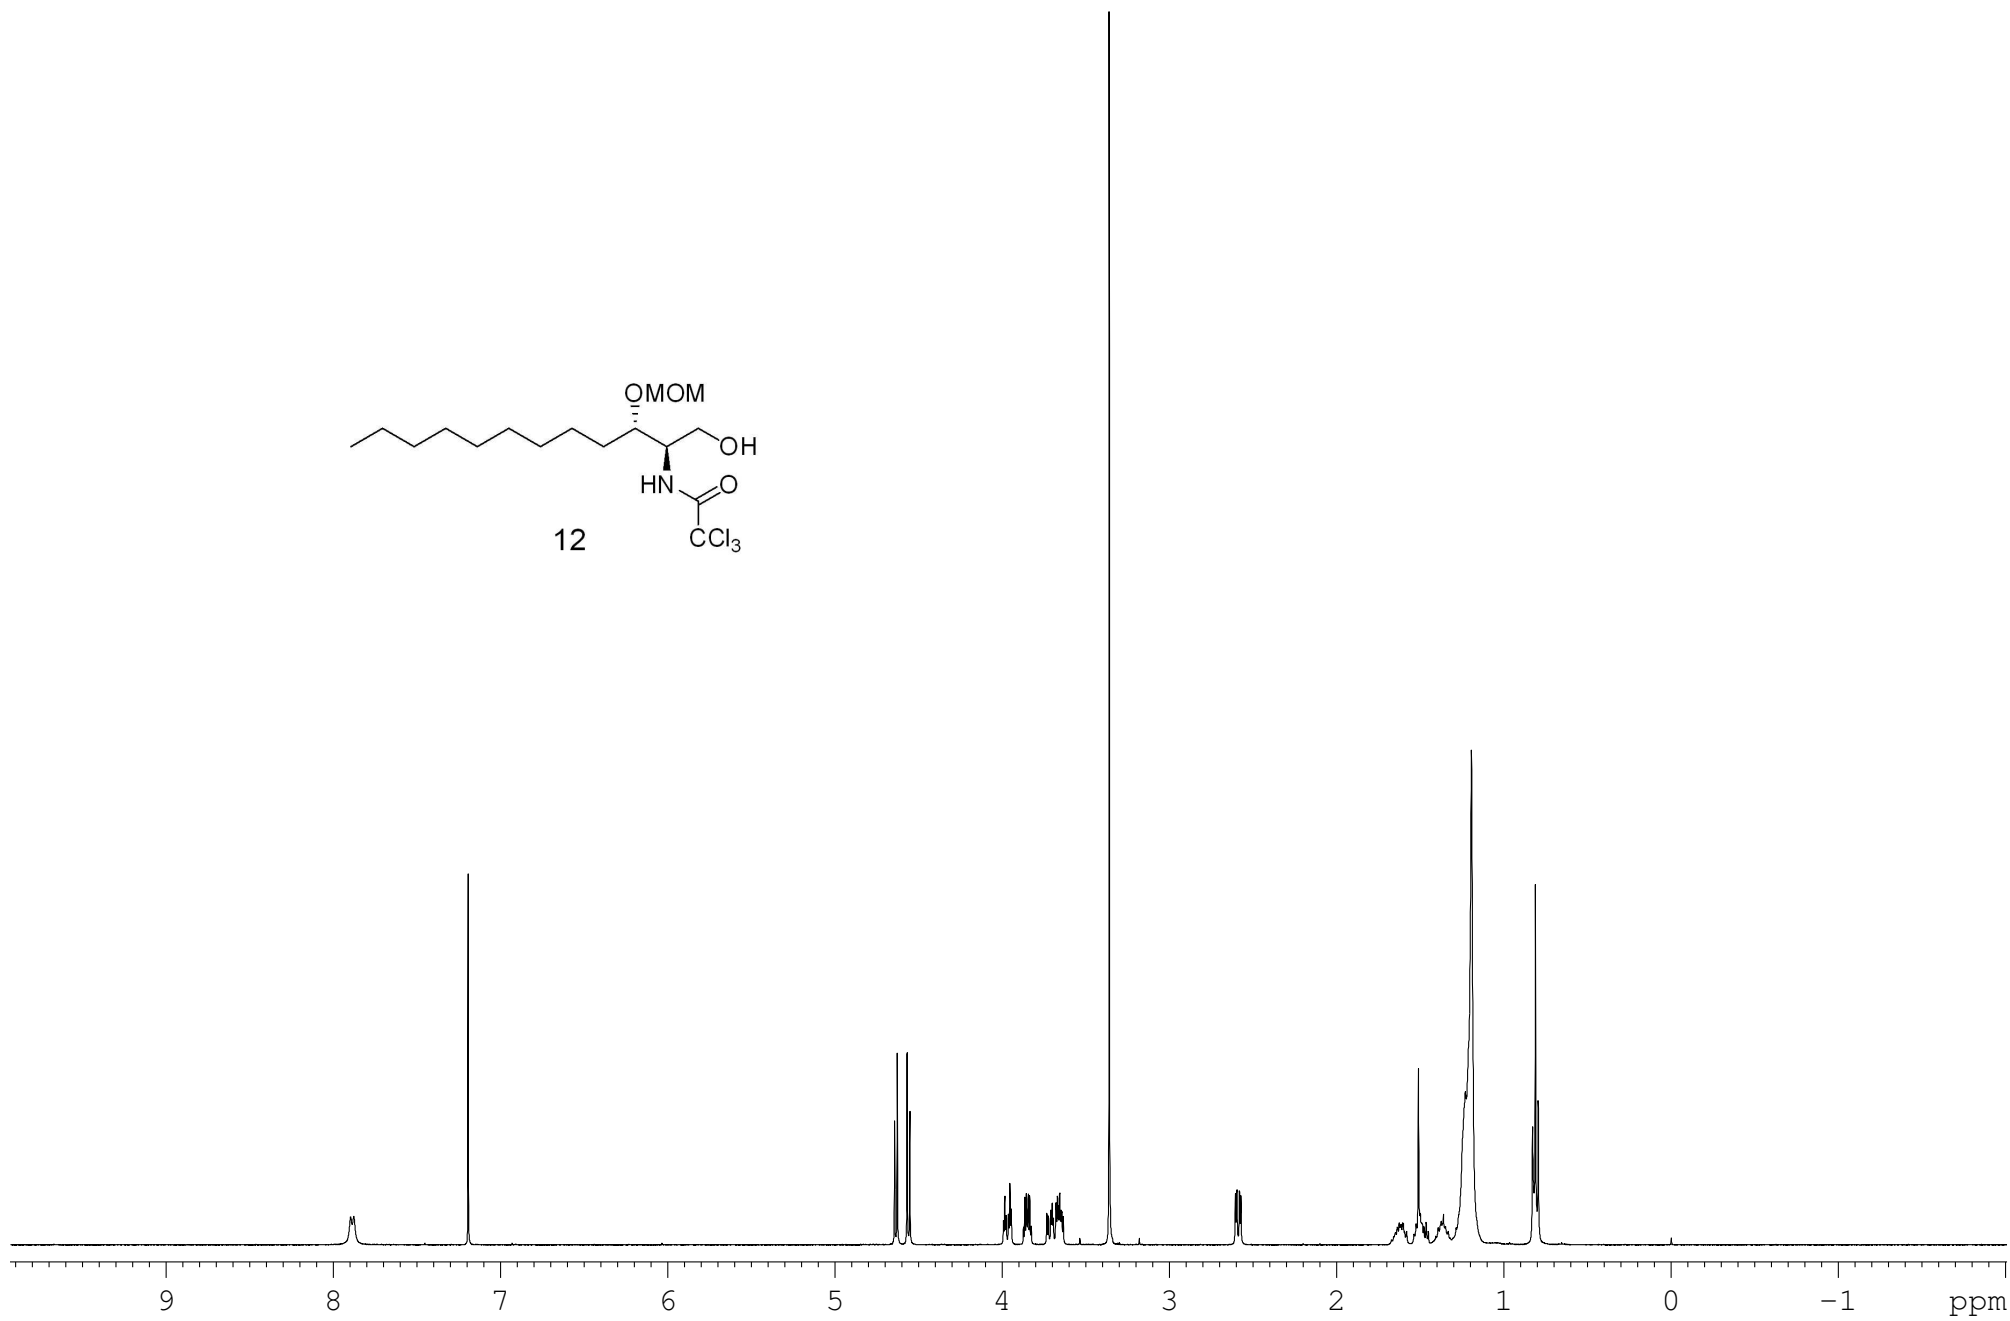

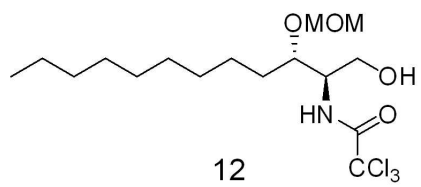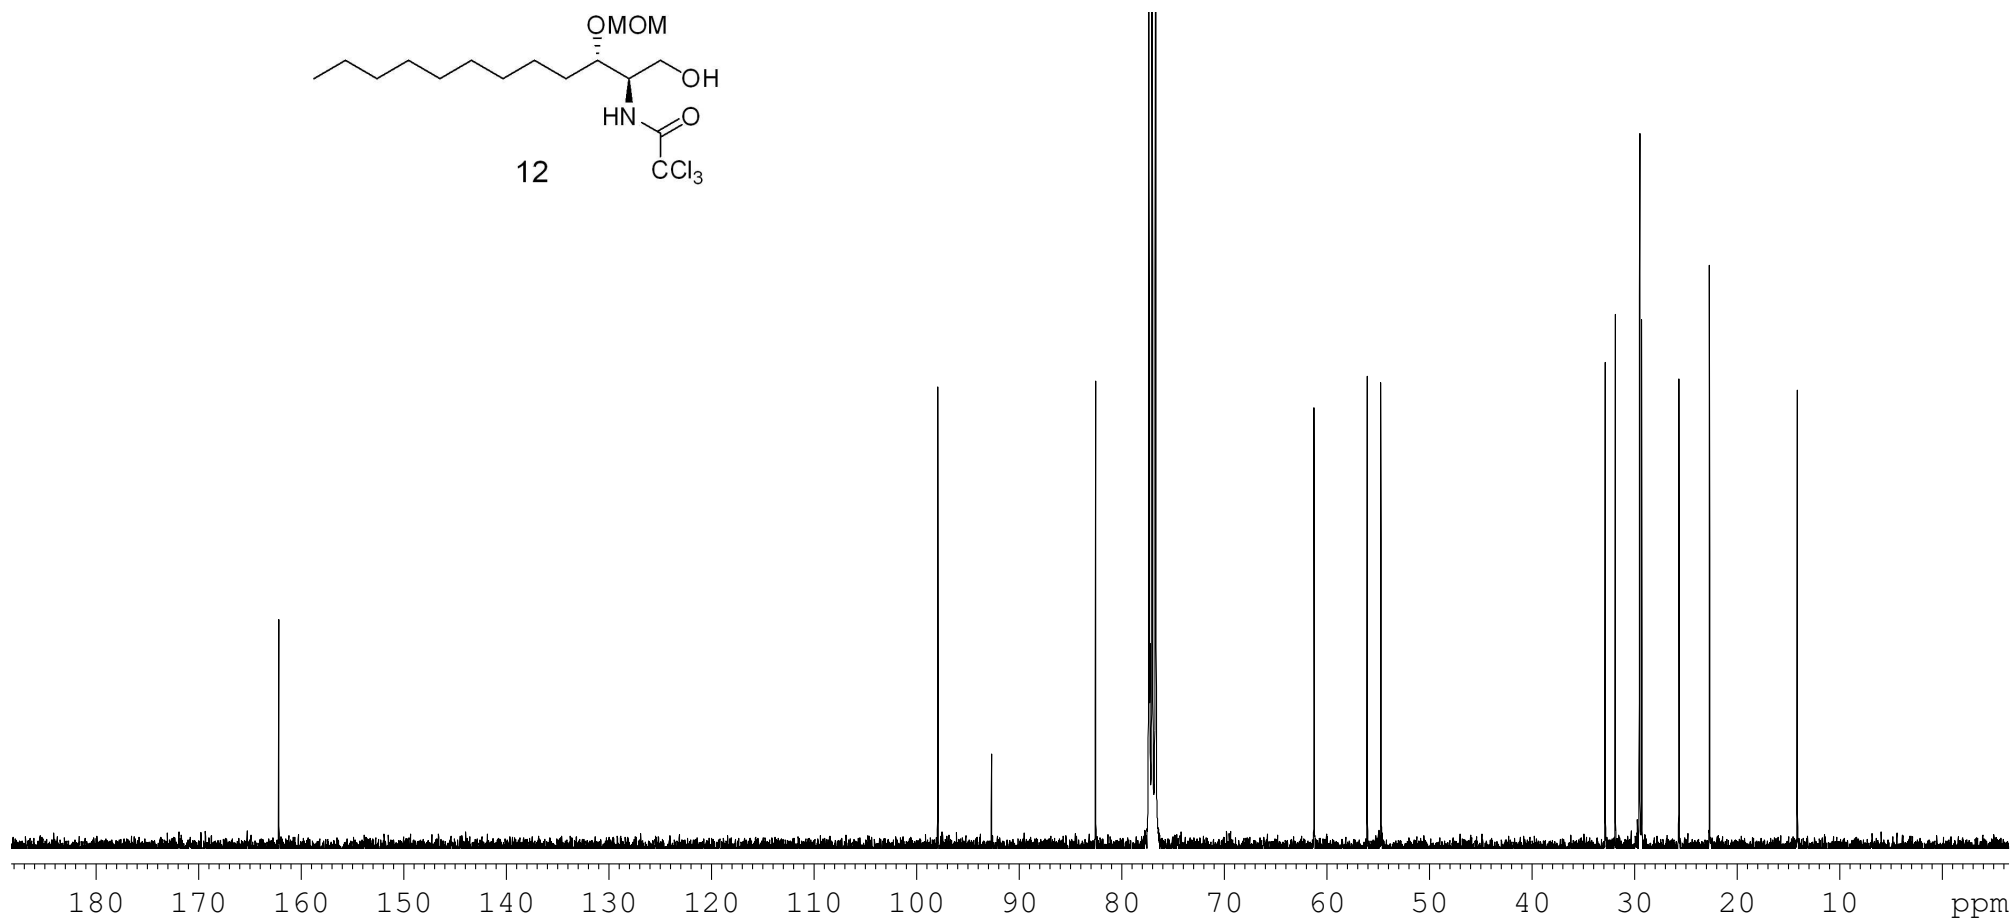

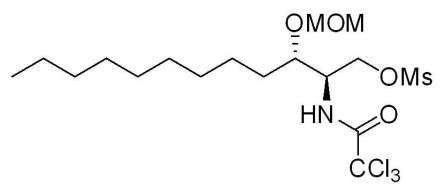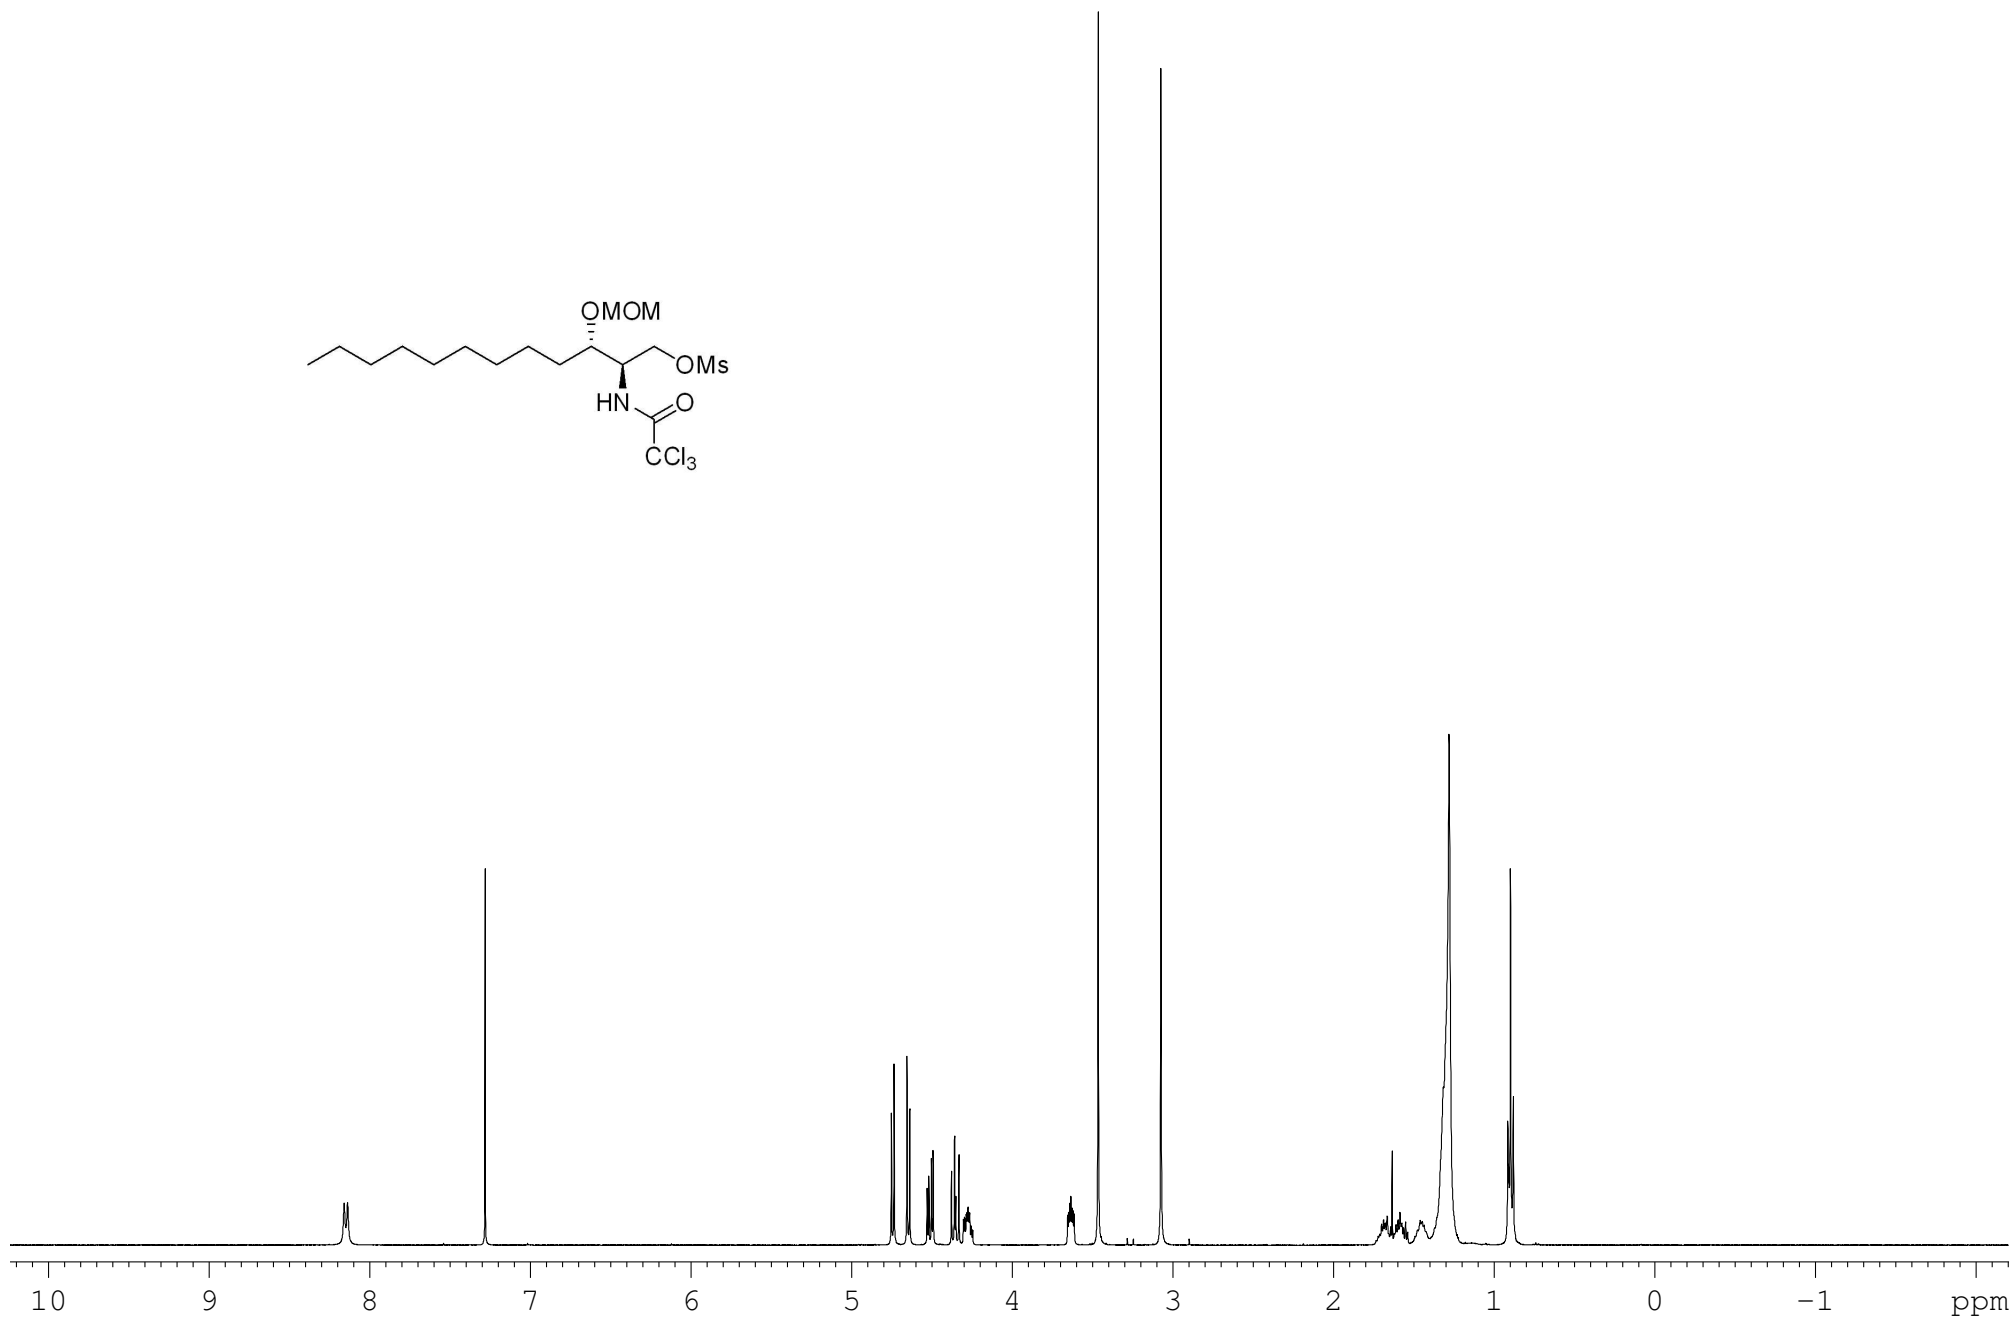



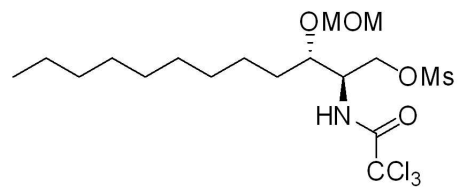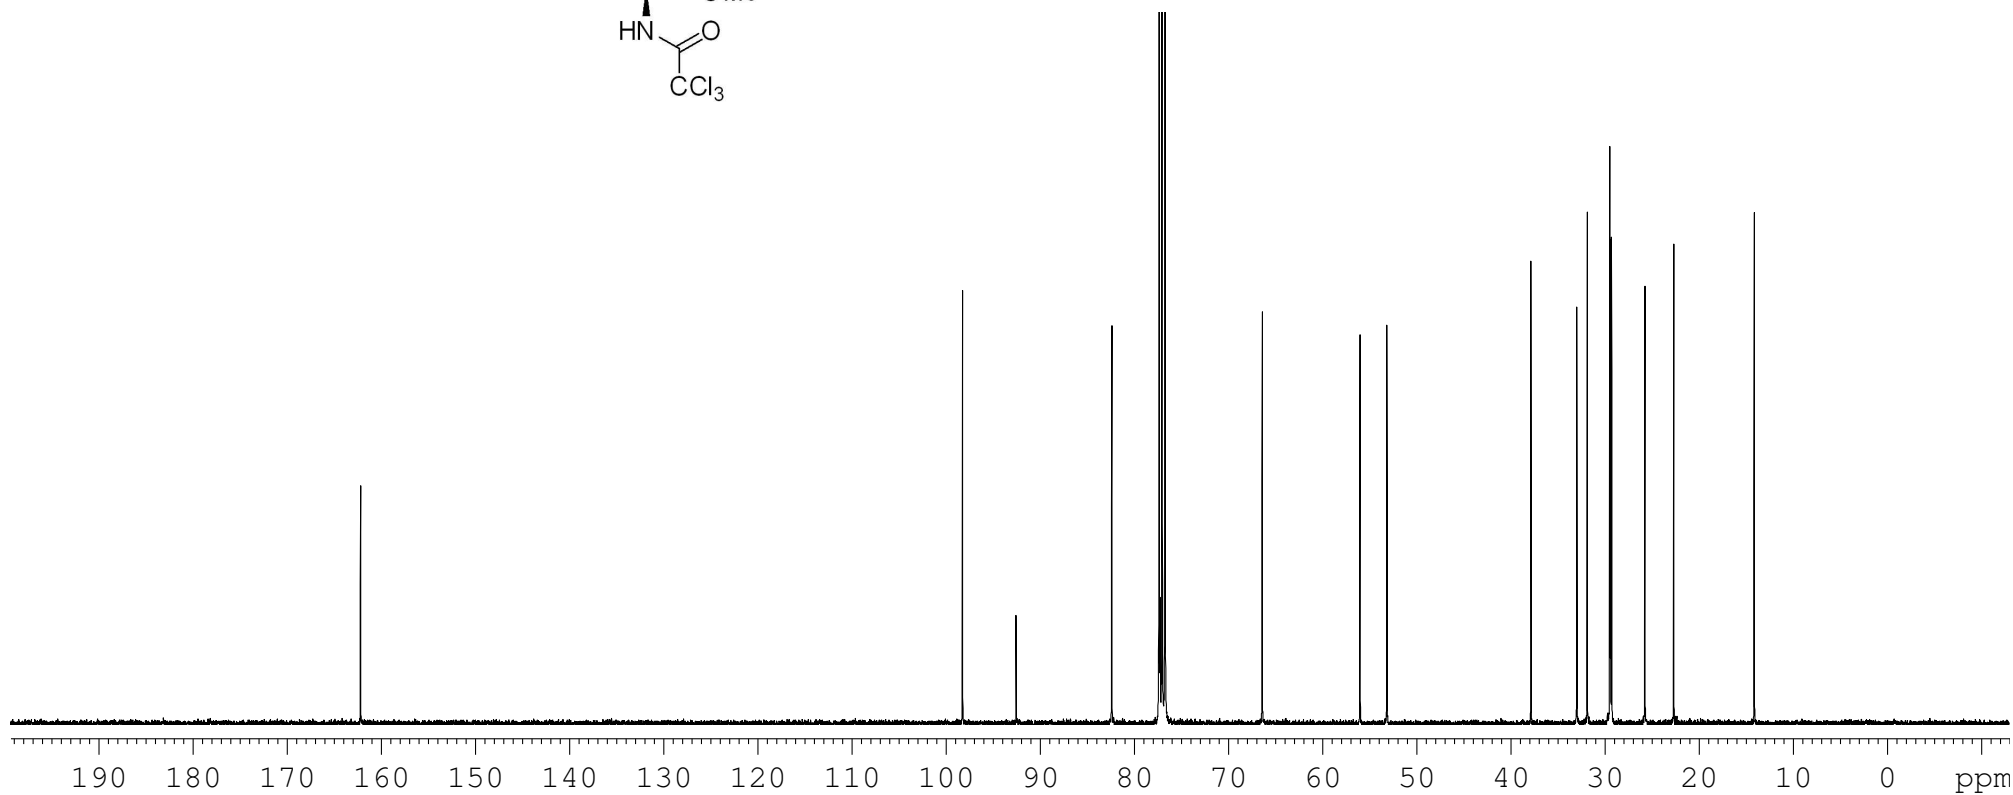

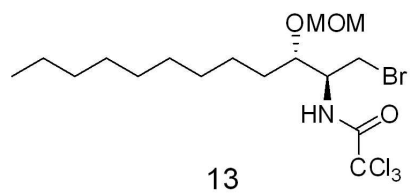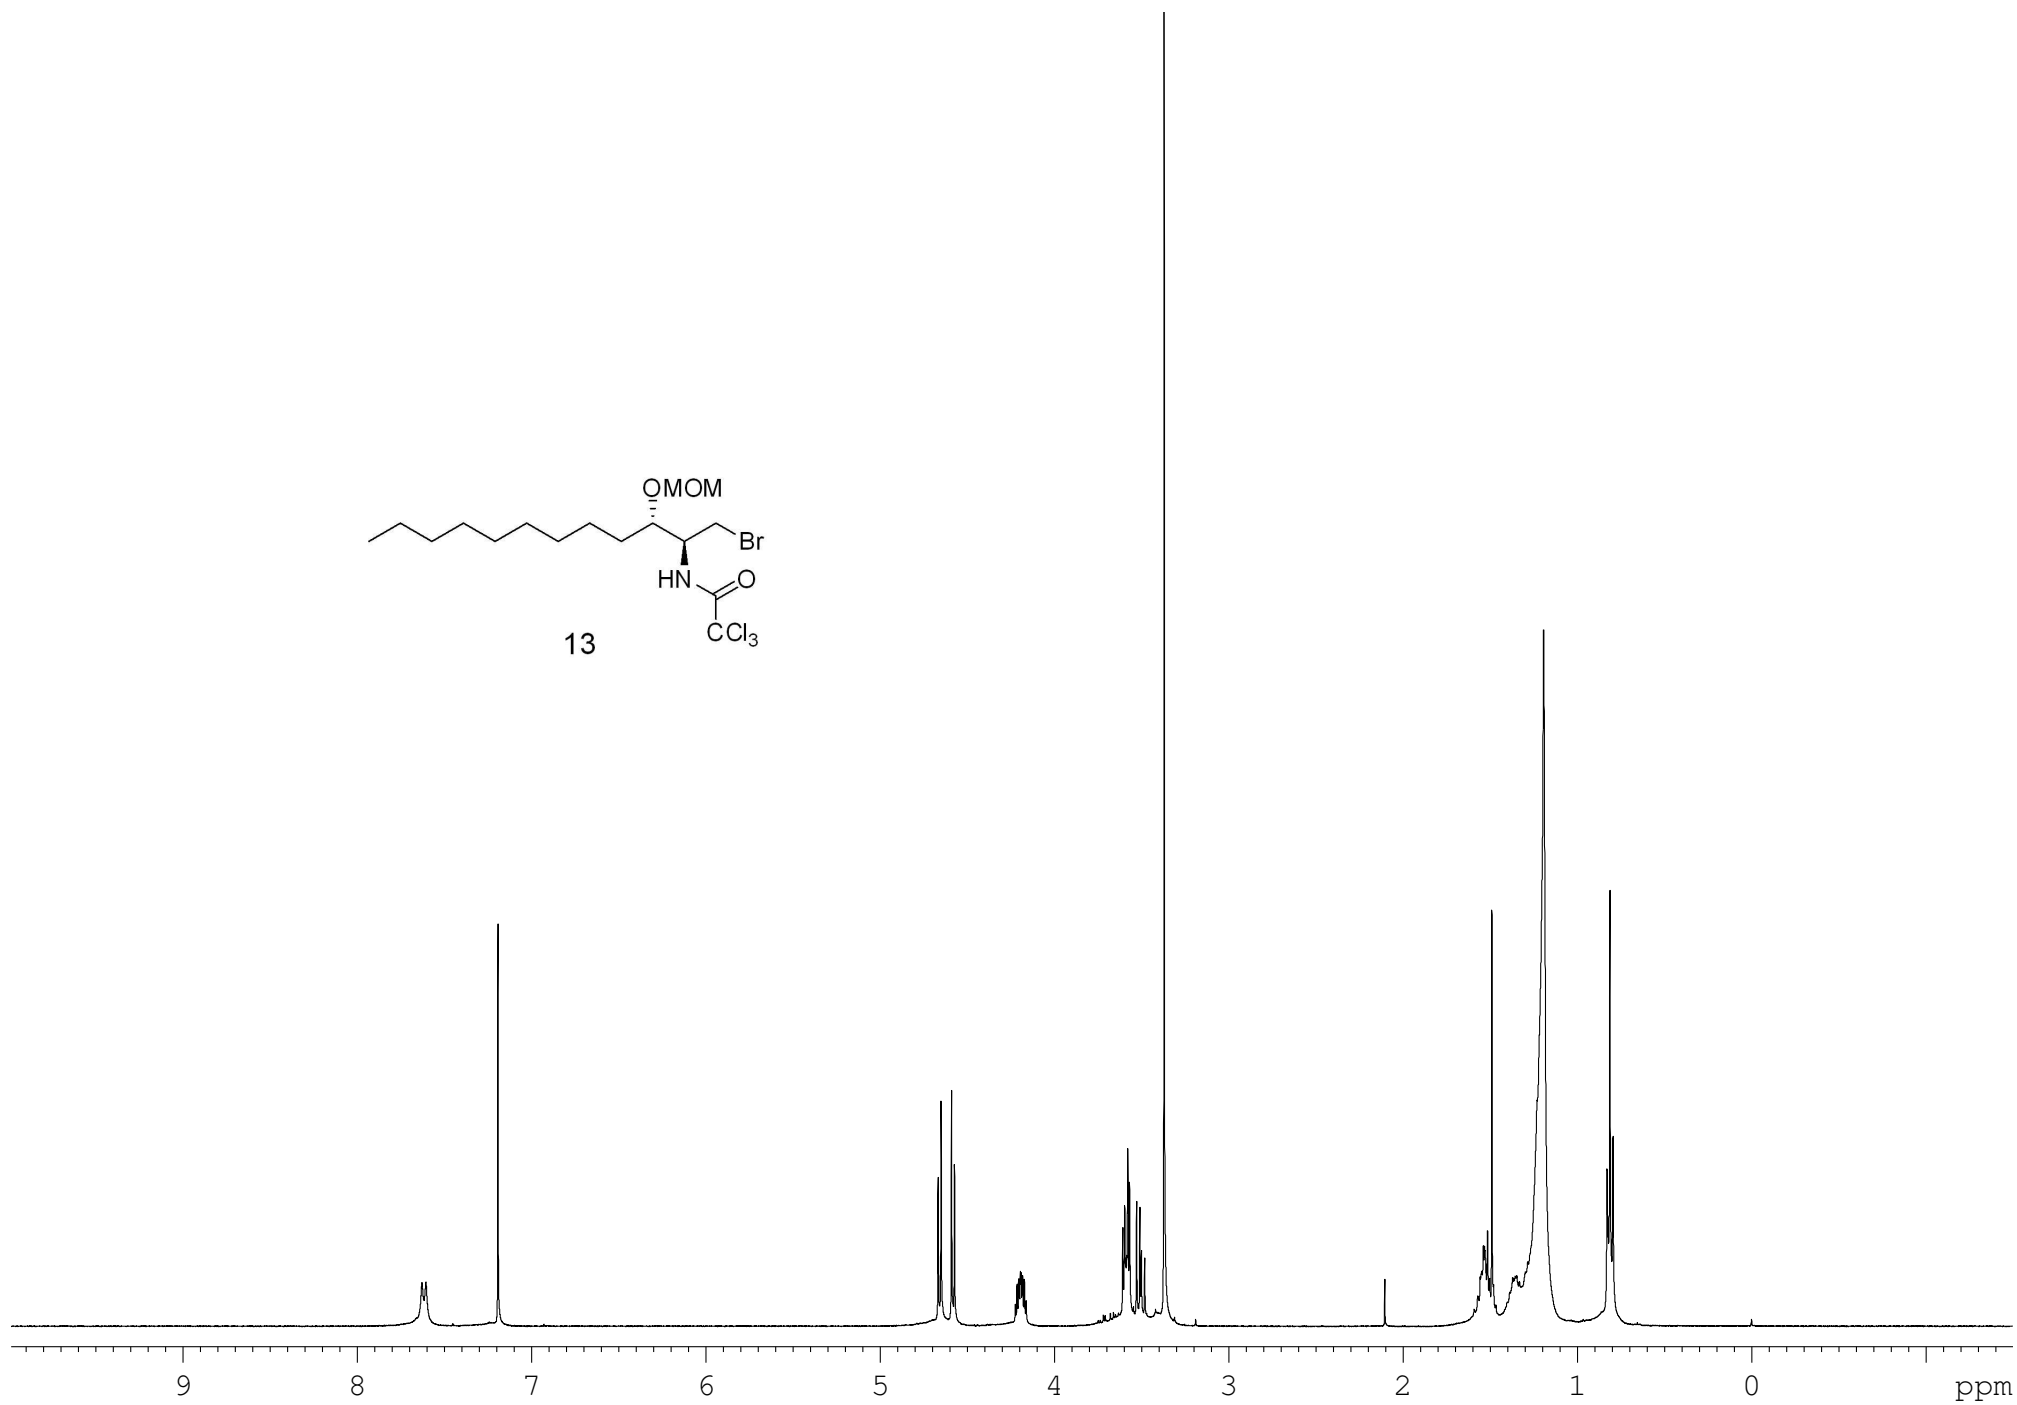

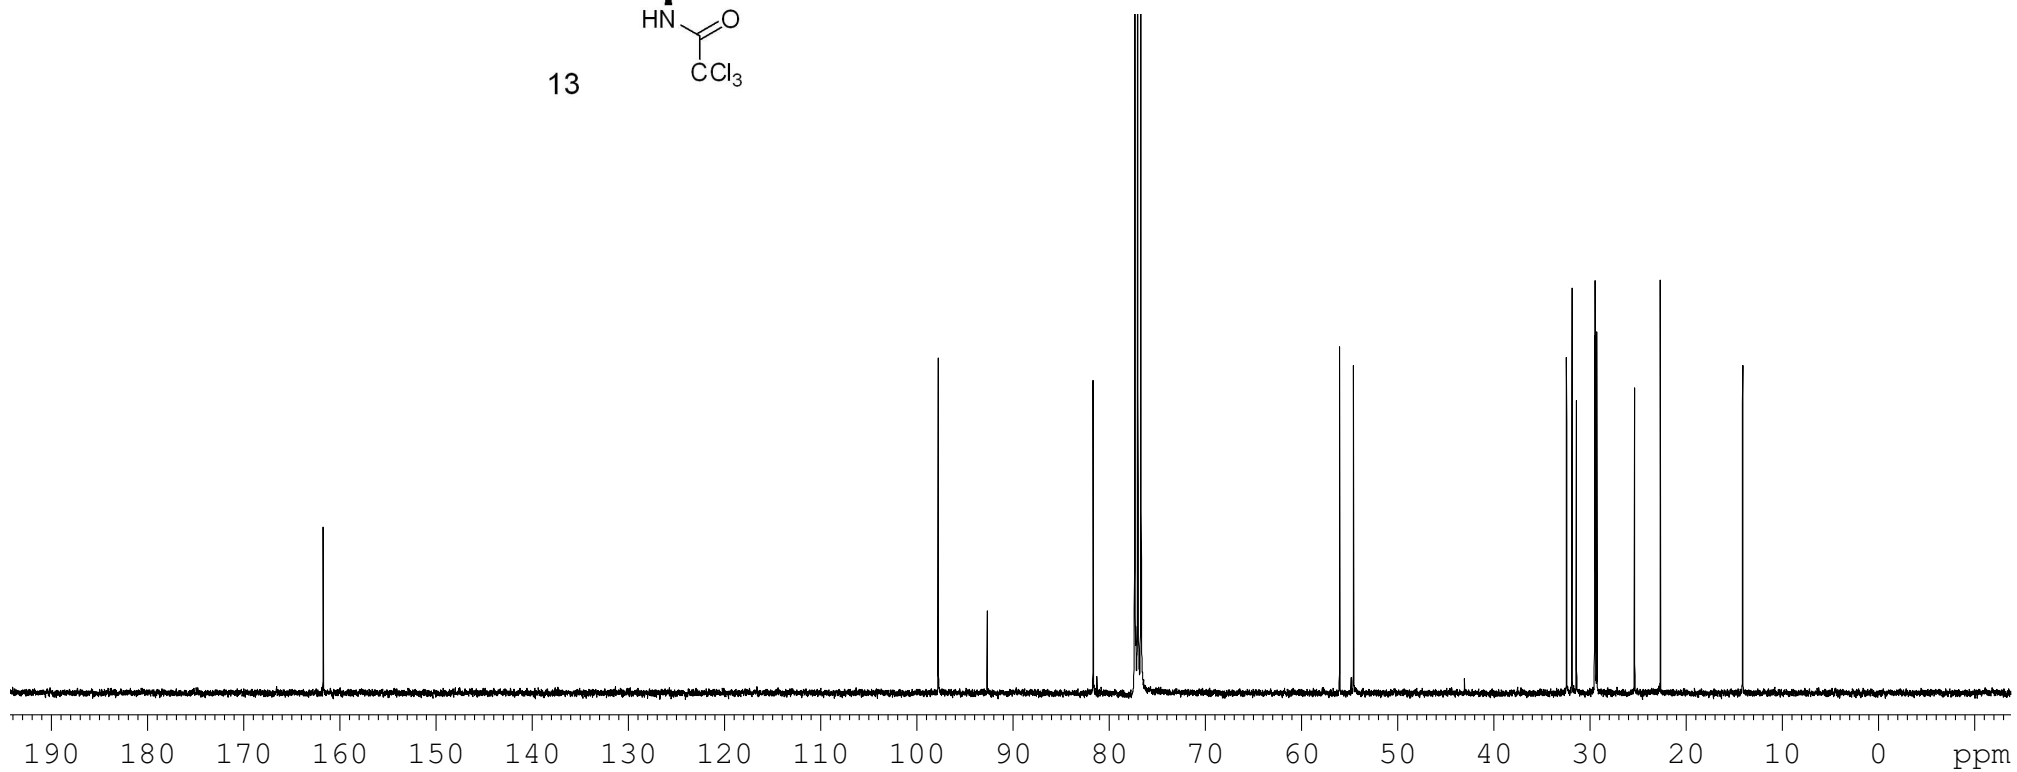

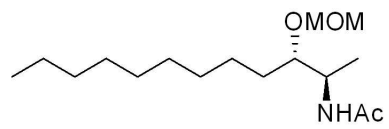

14

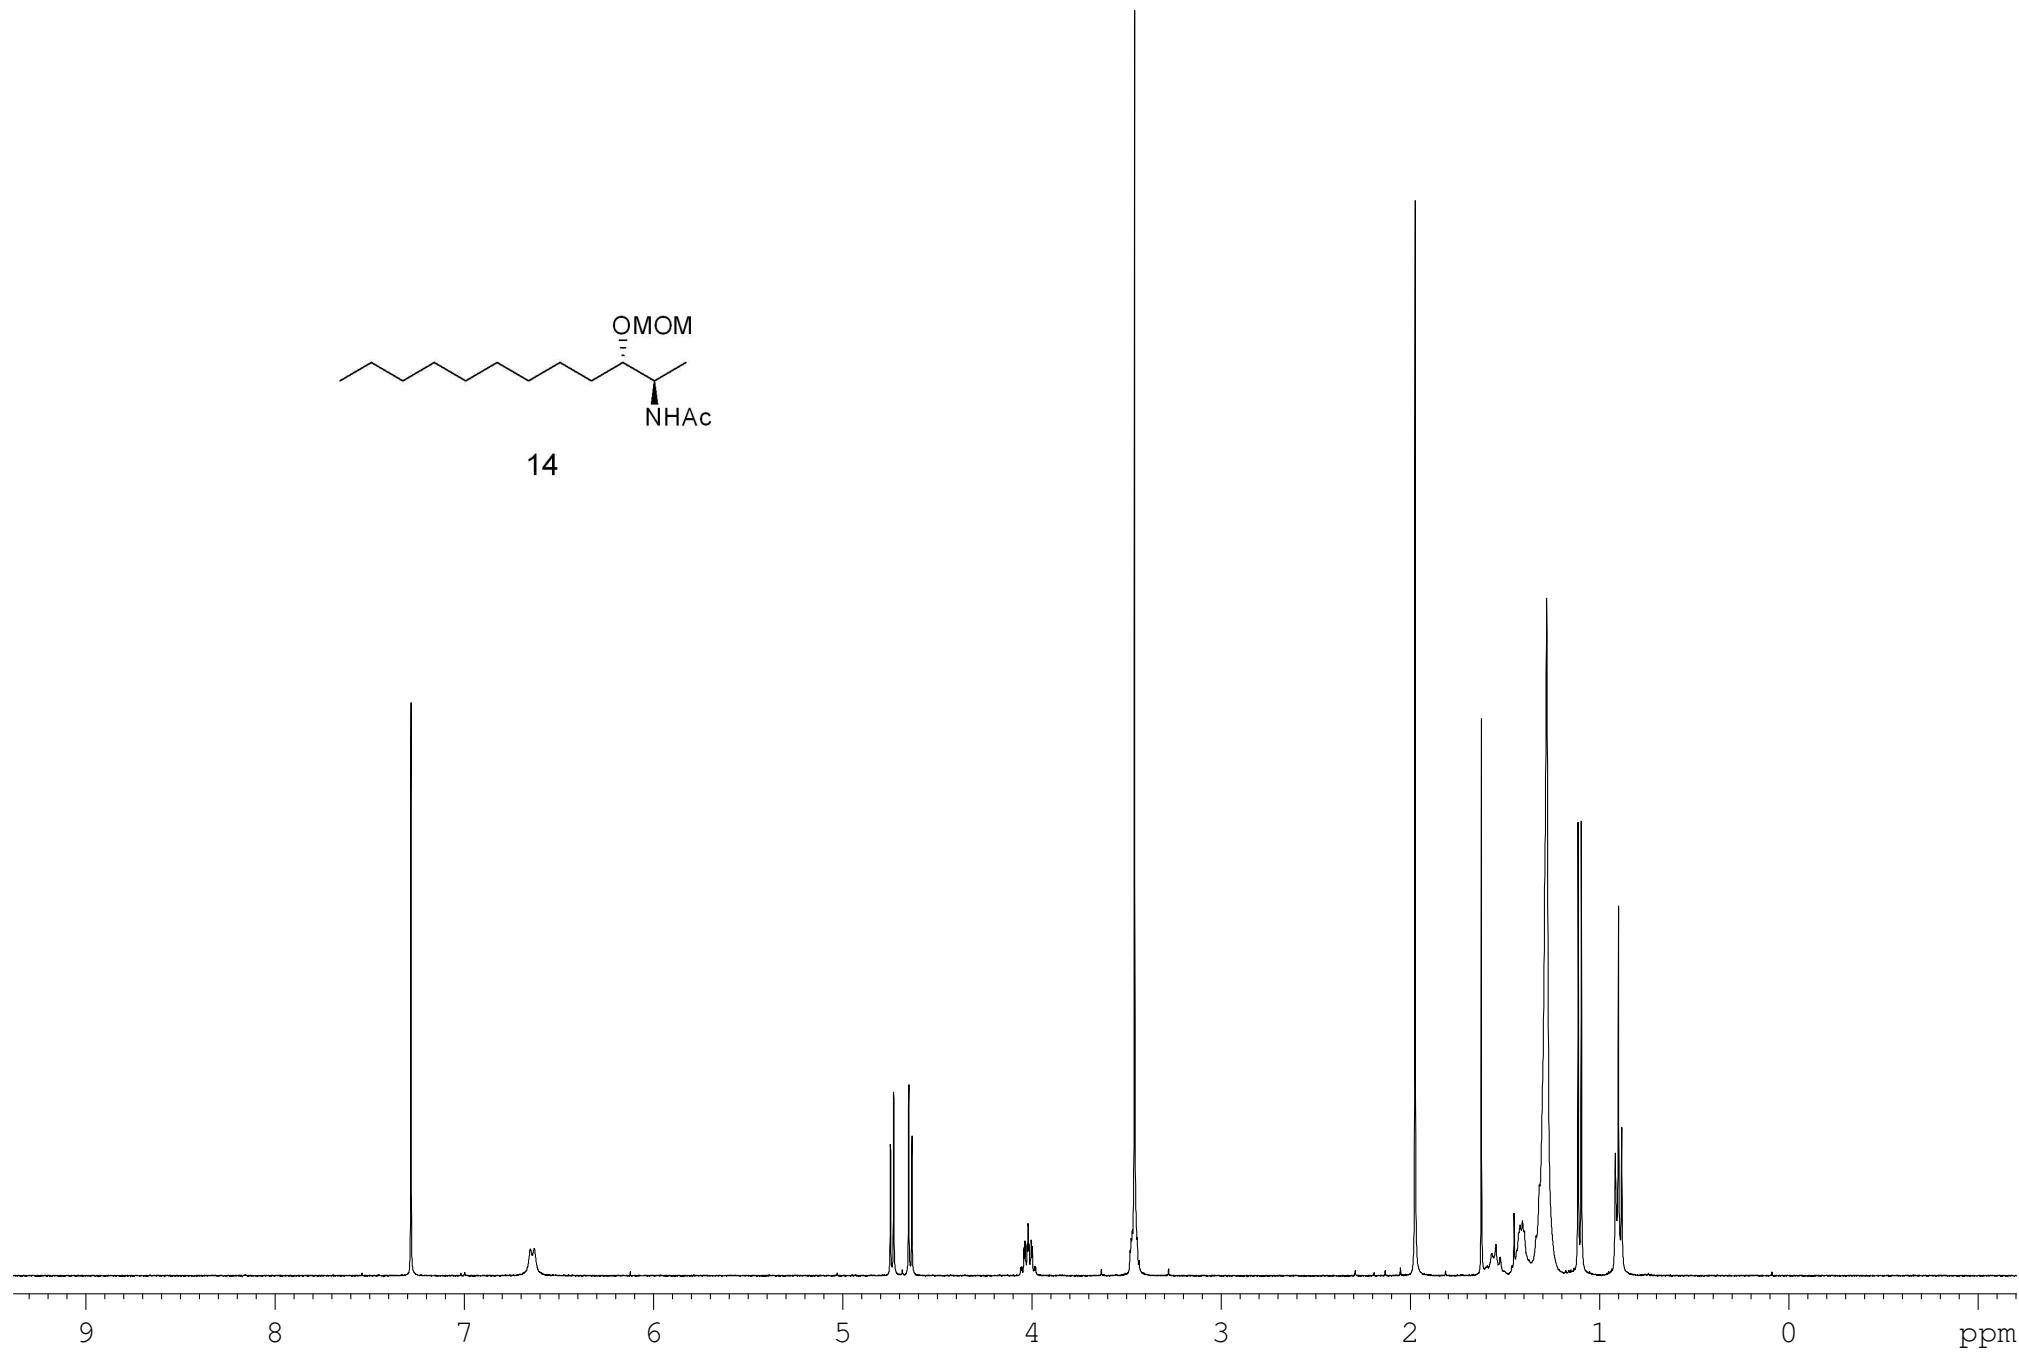

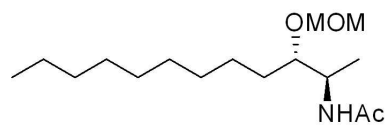

14

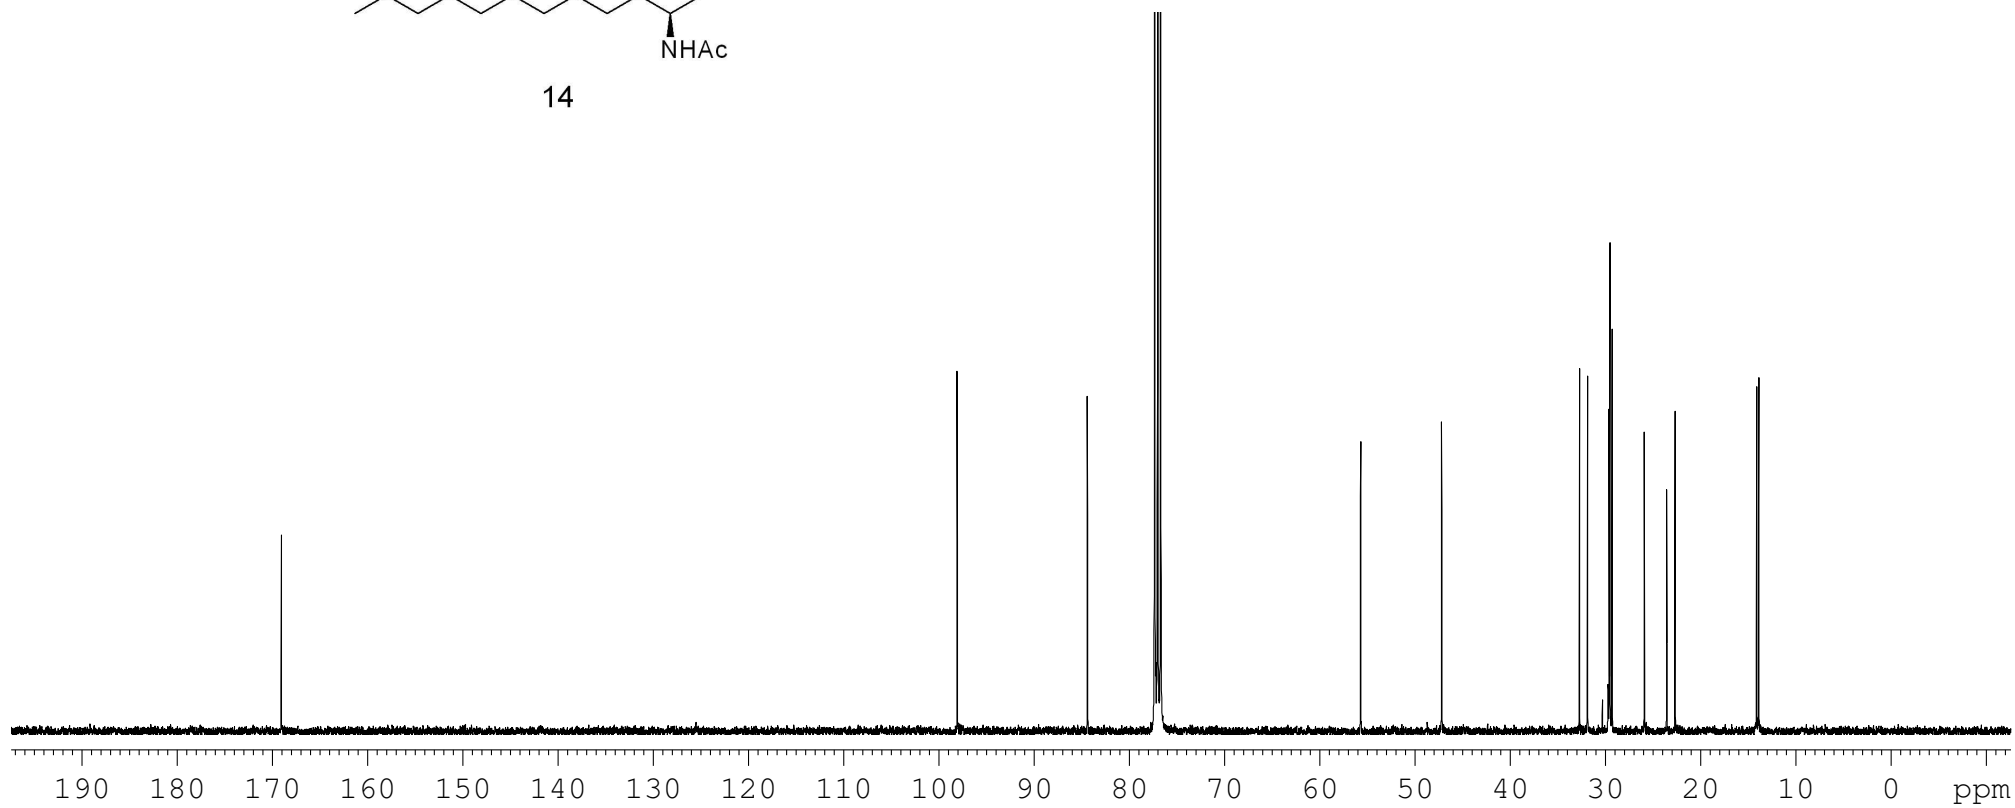

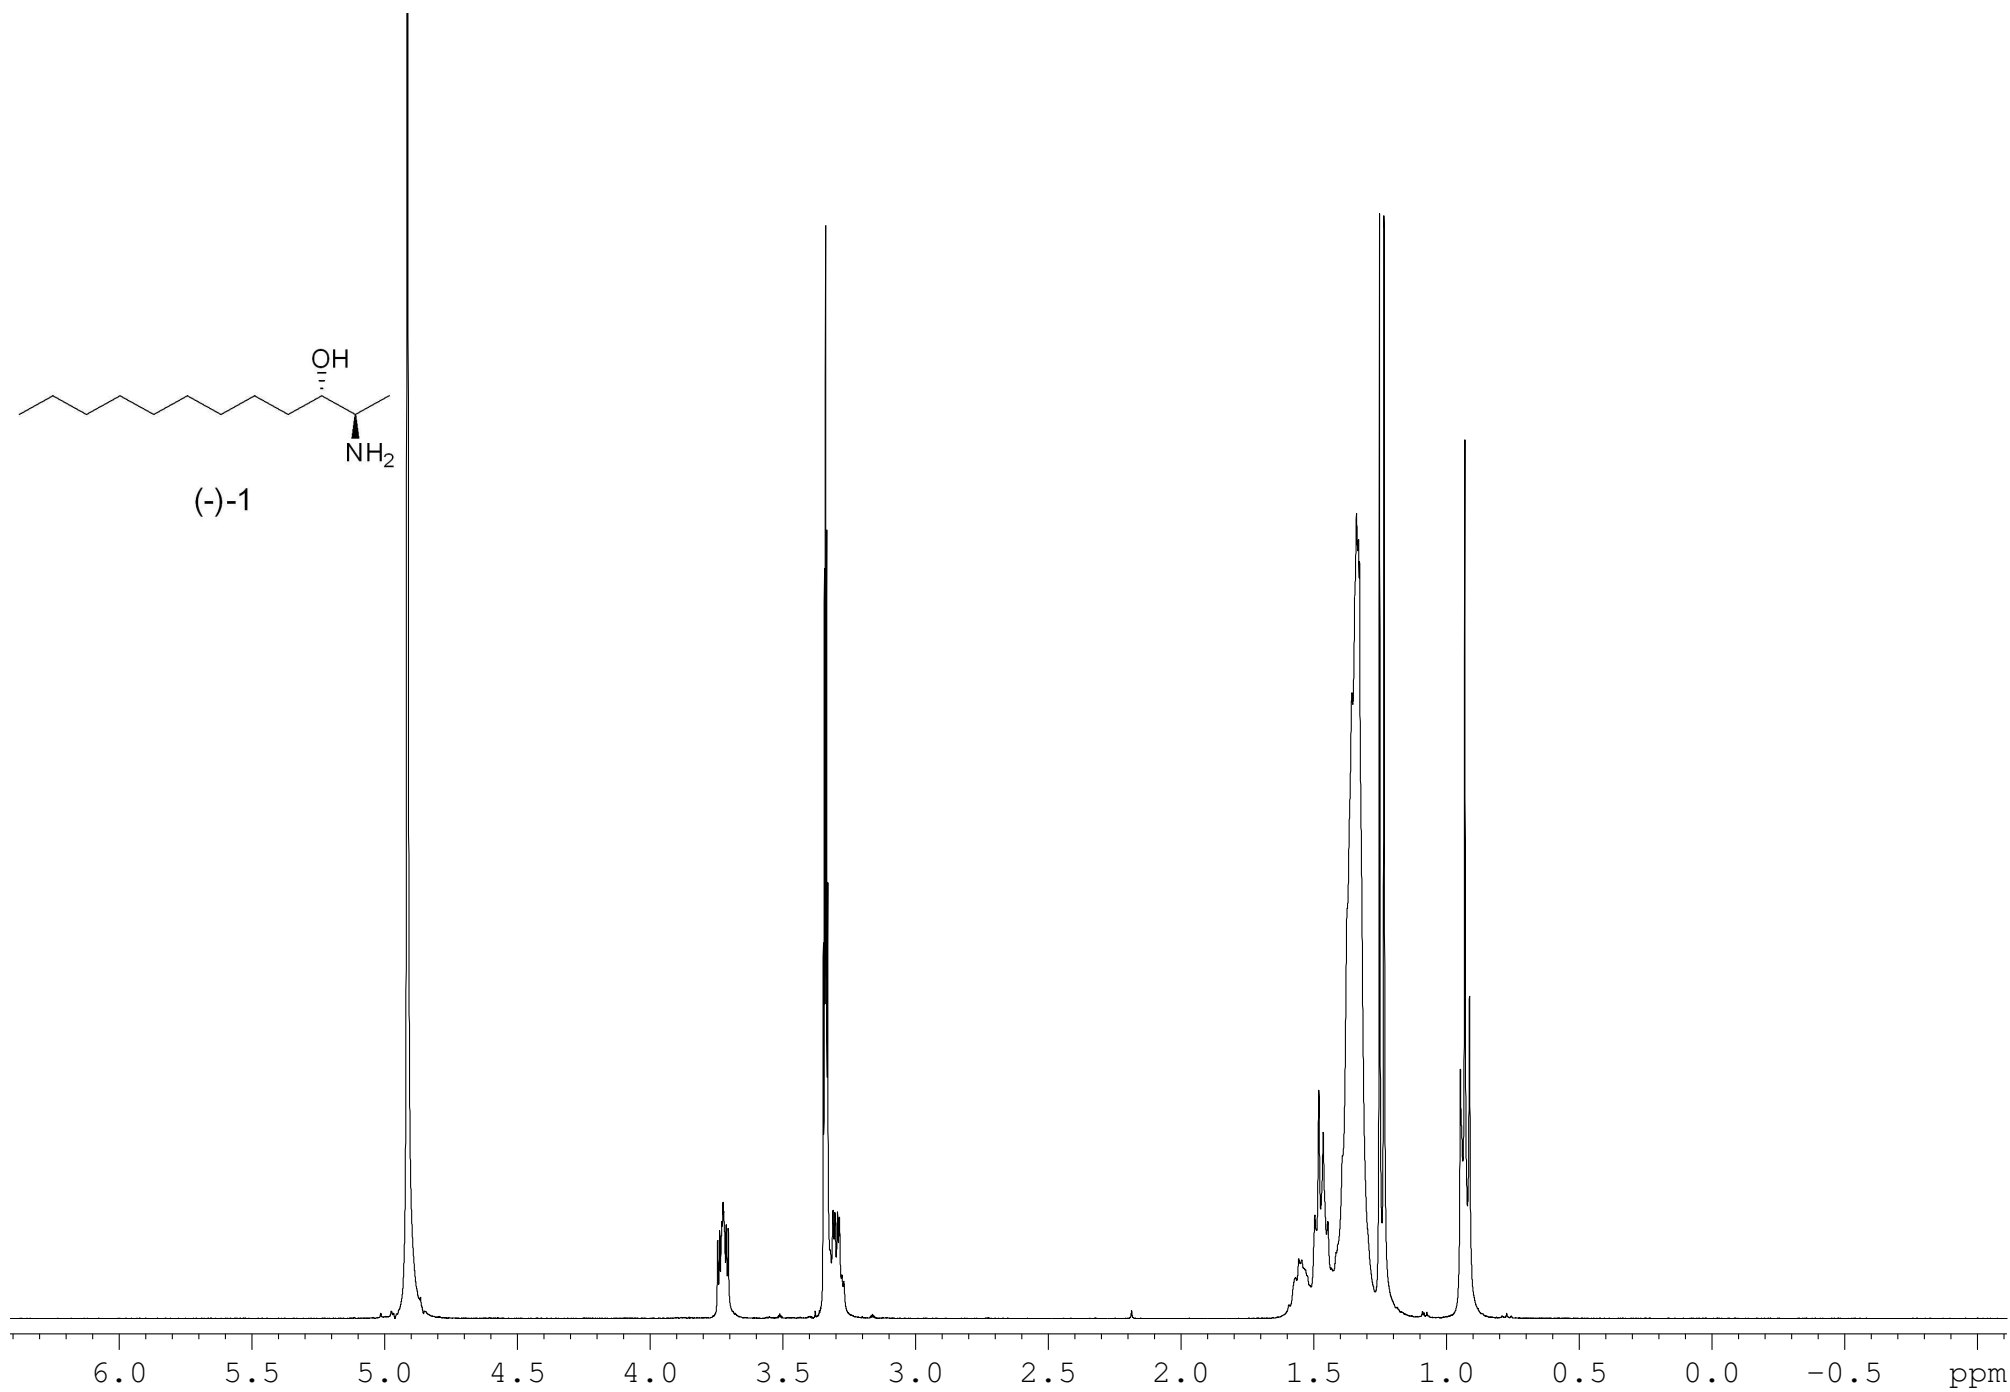

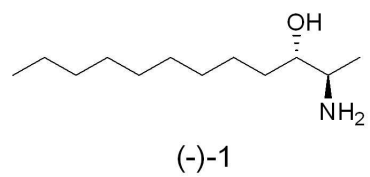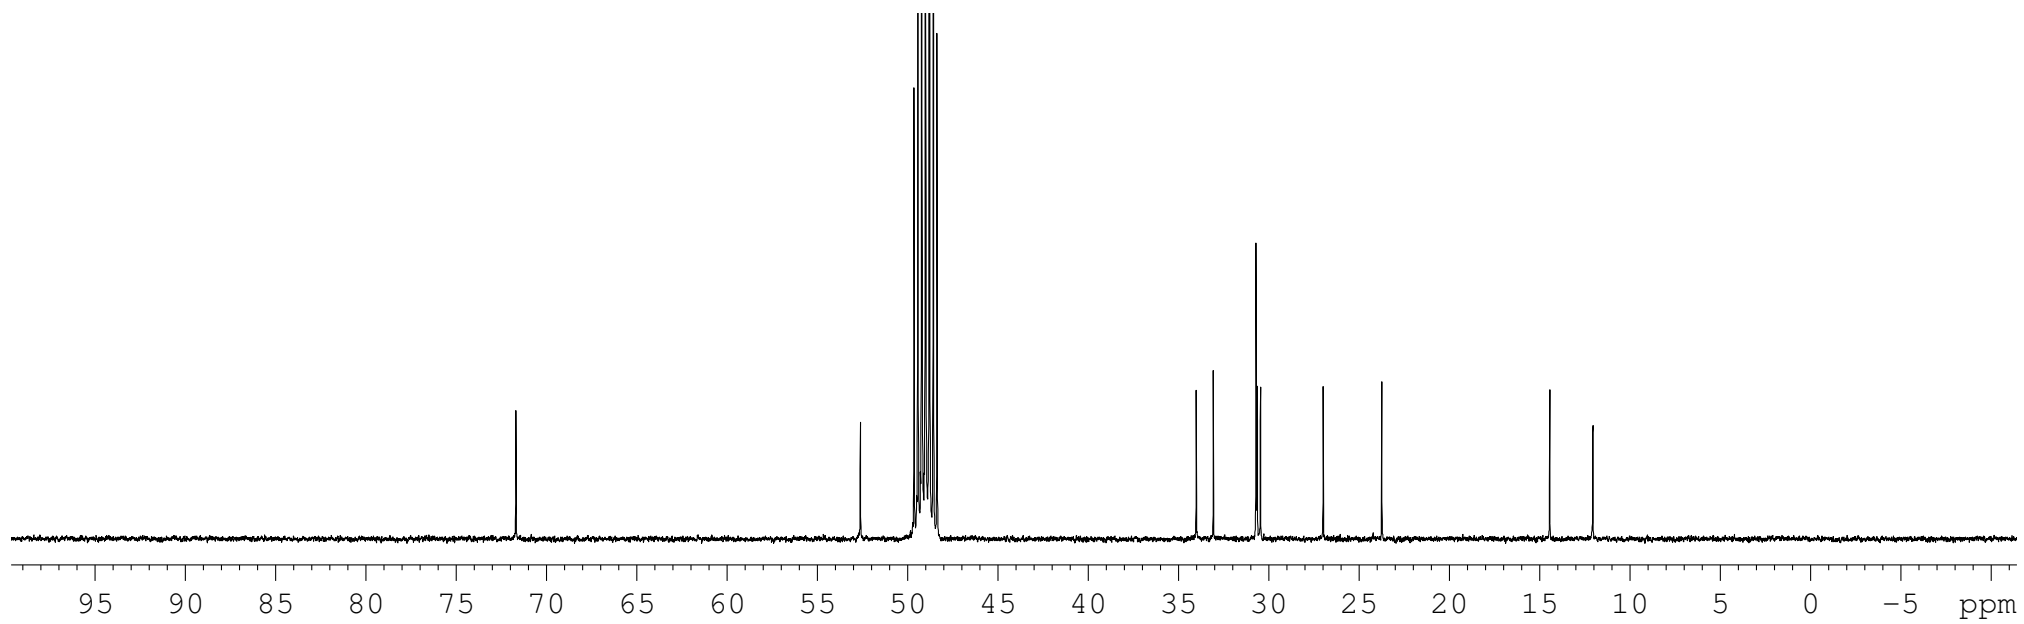

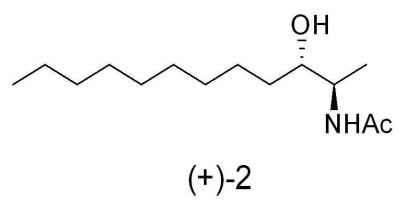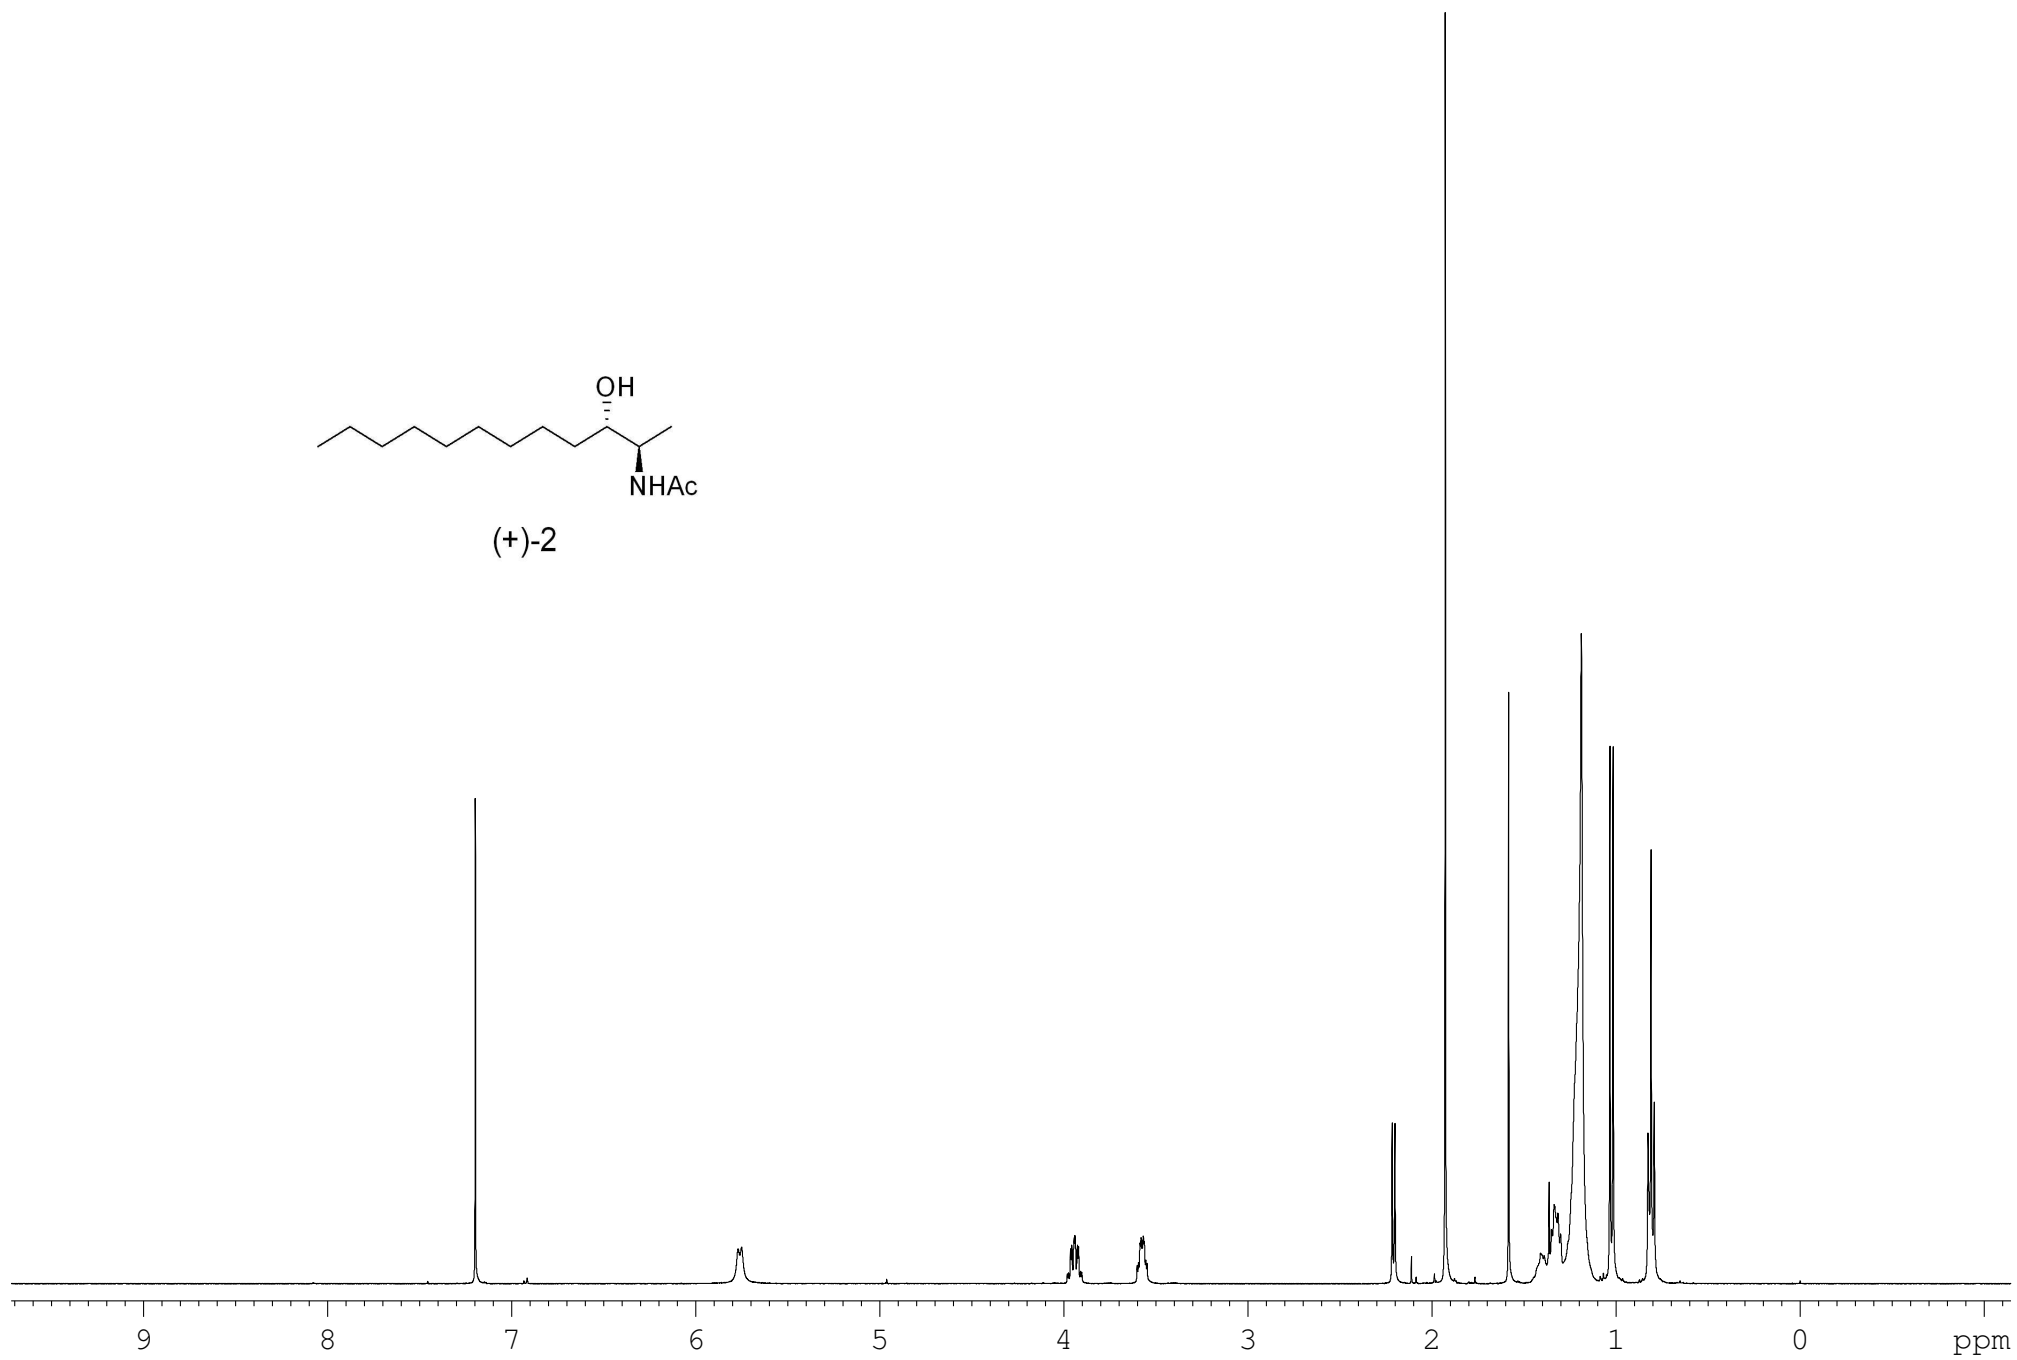



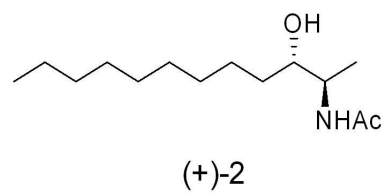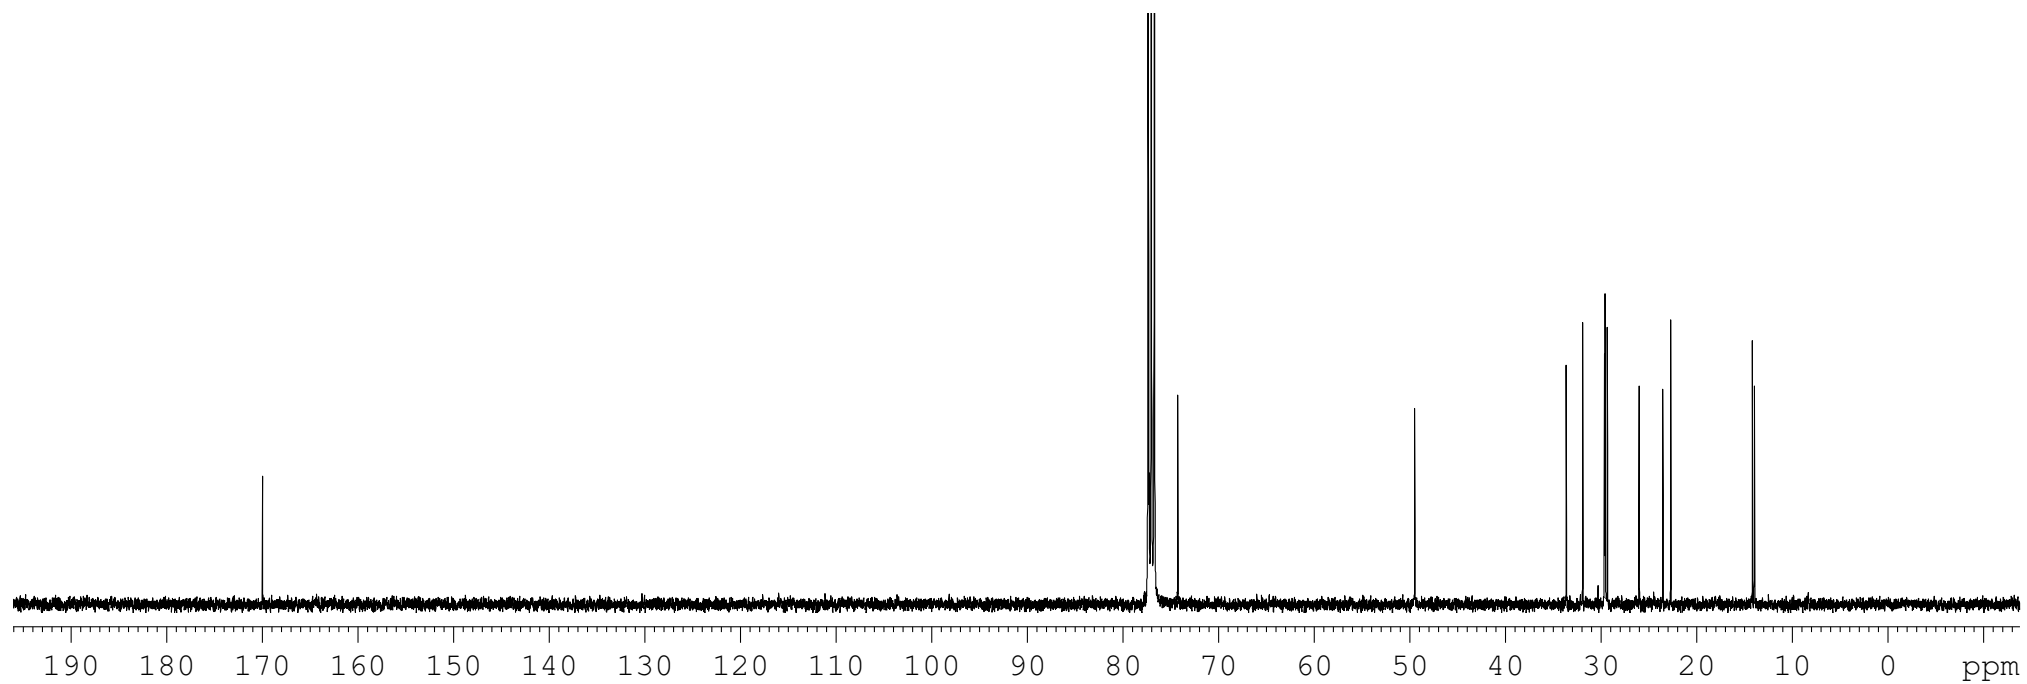

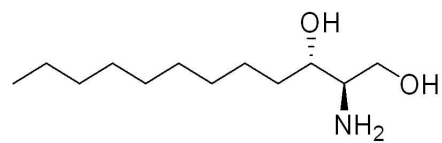

(+)-15

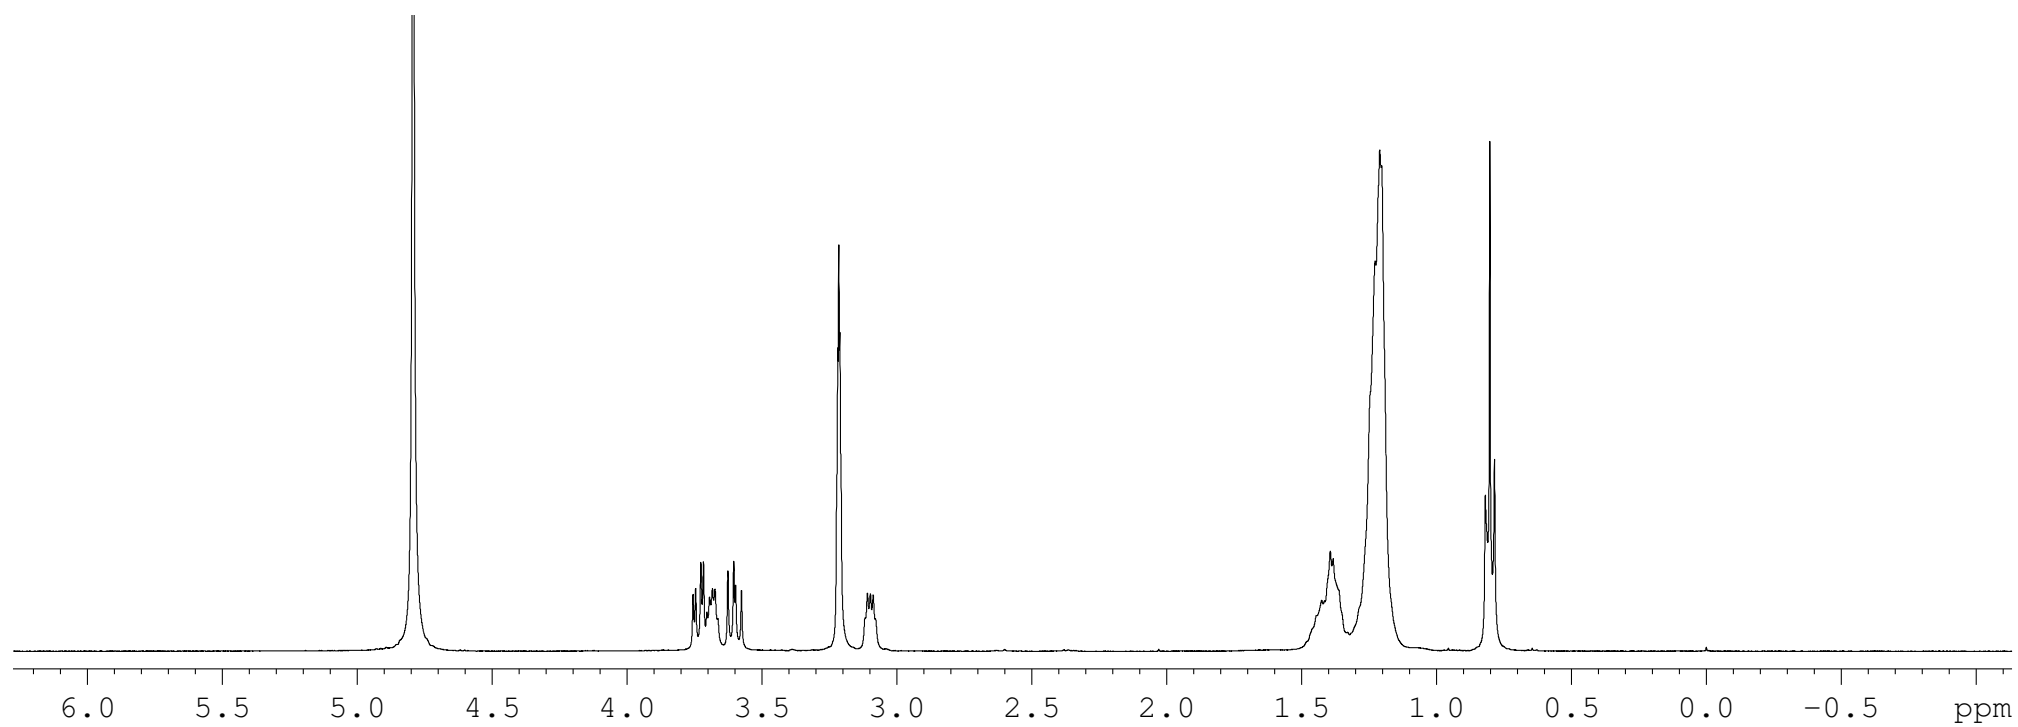

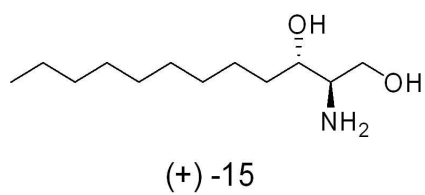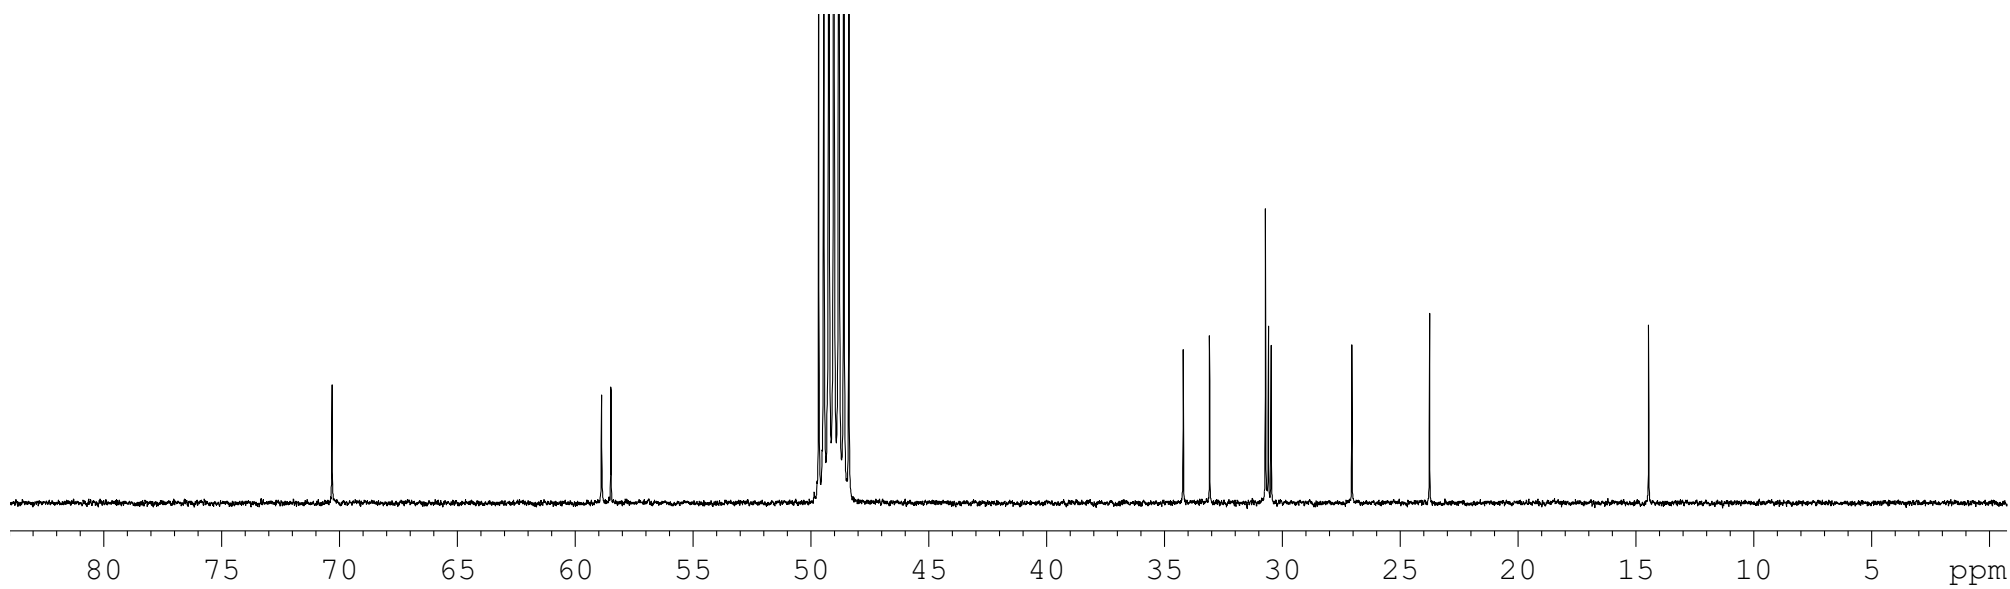

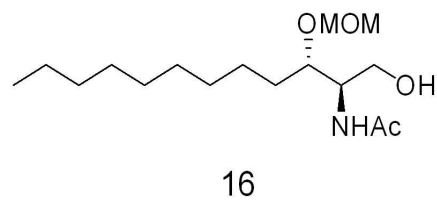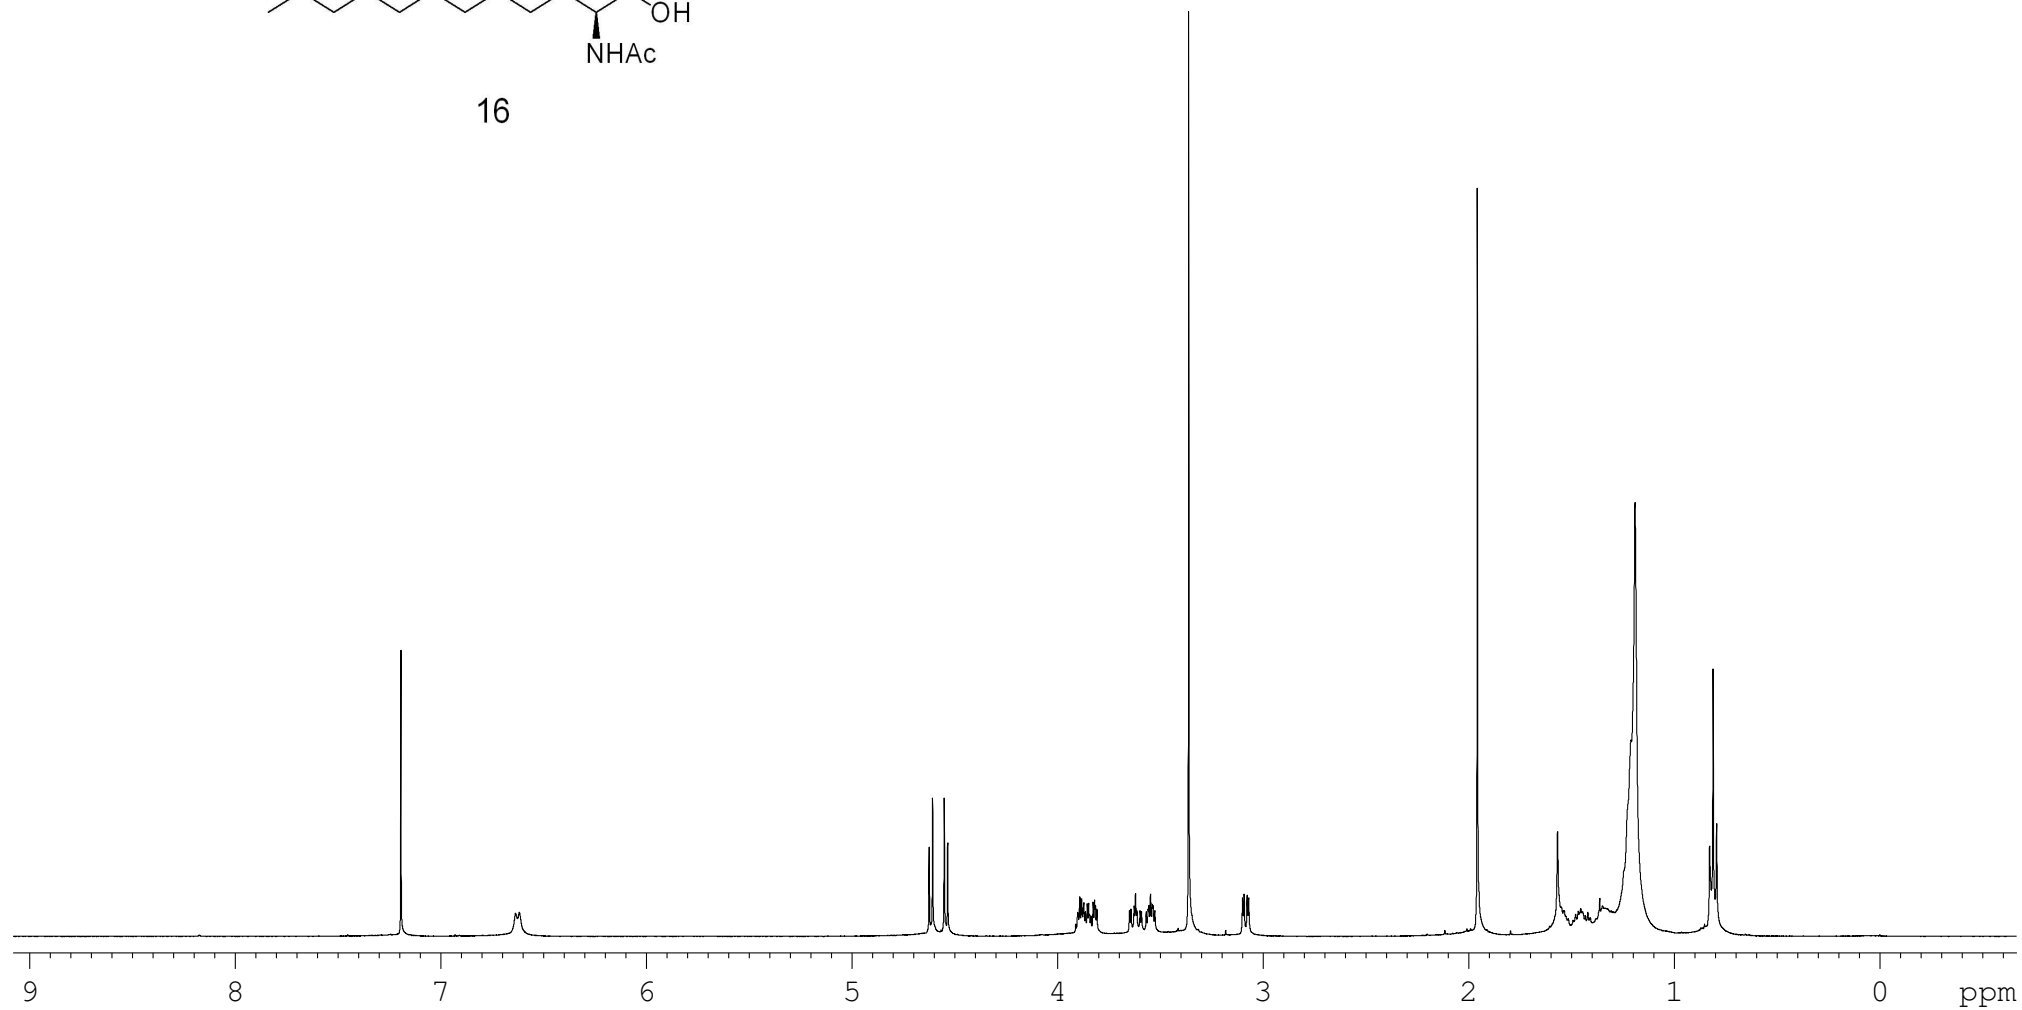

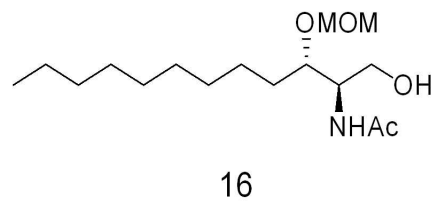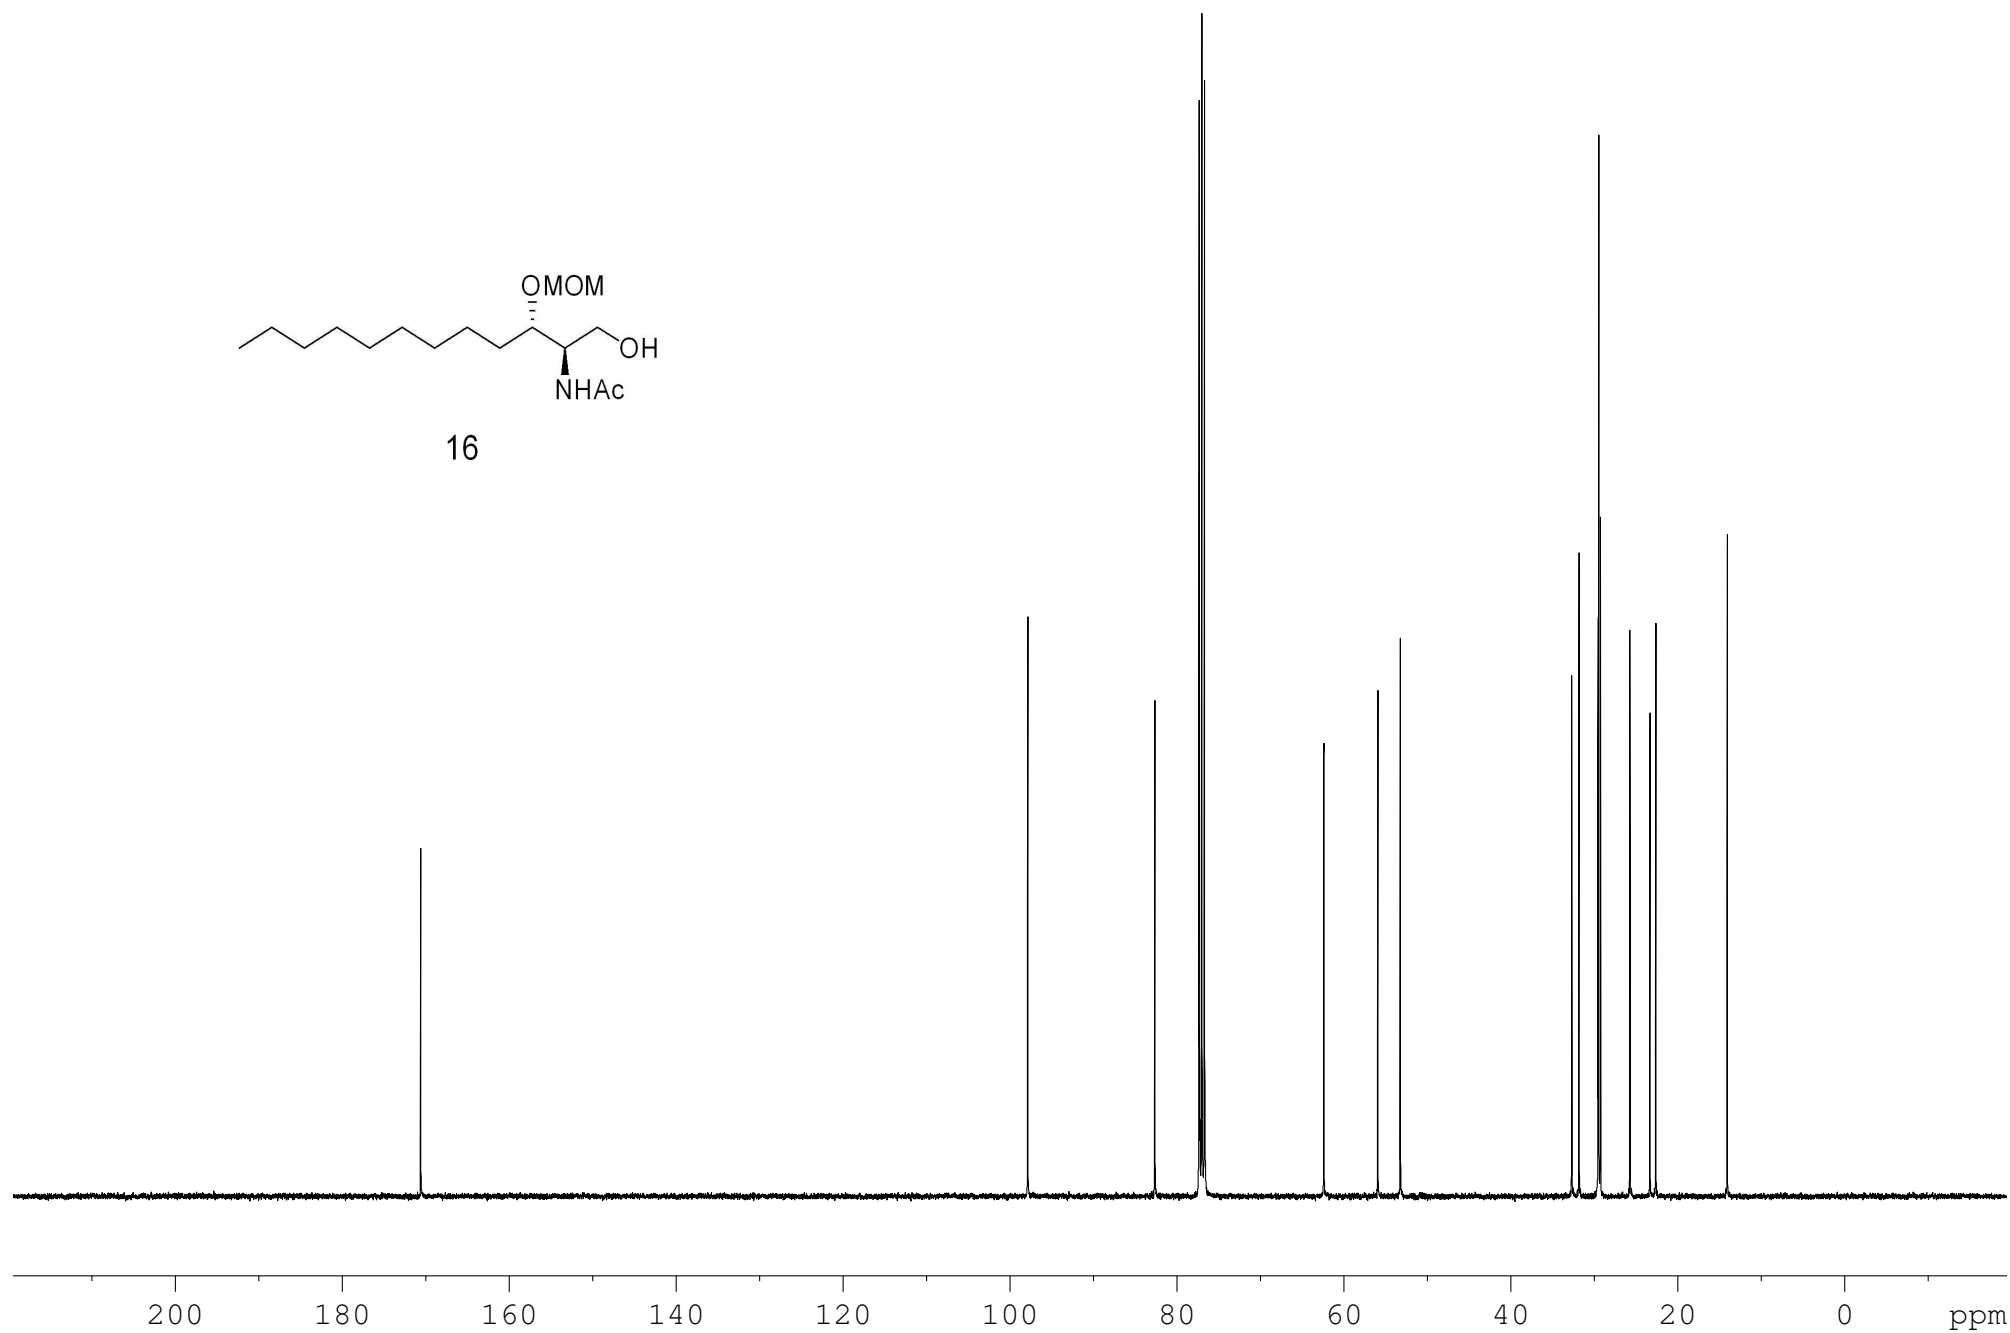

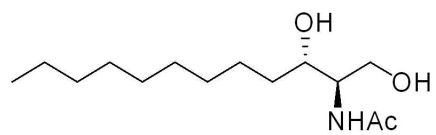

(+)-3

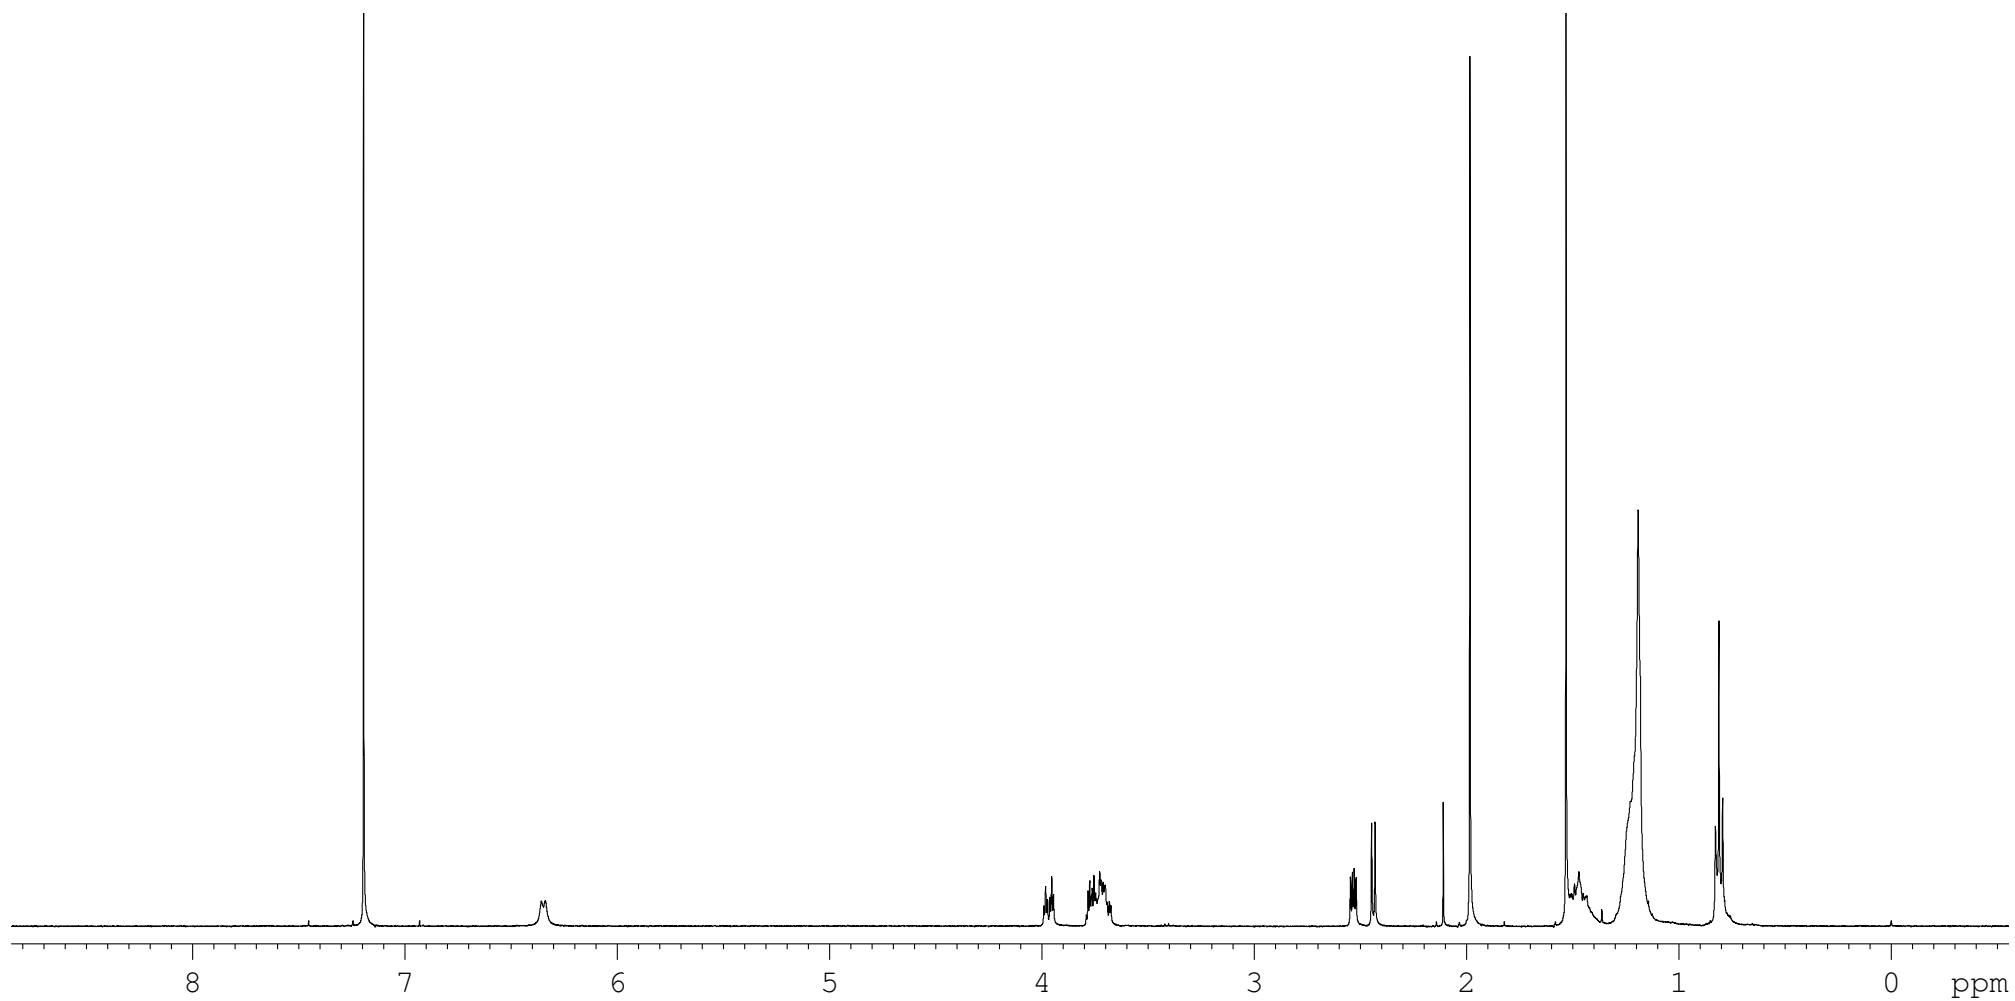

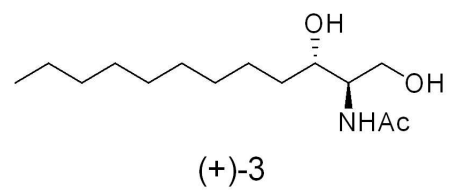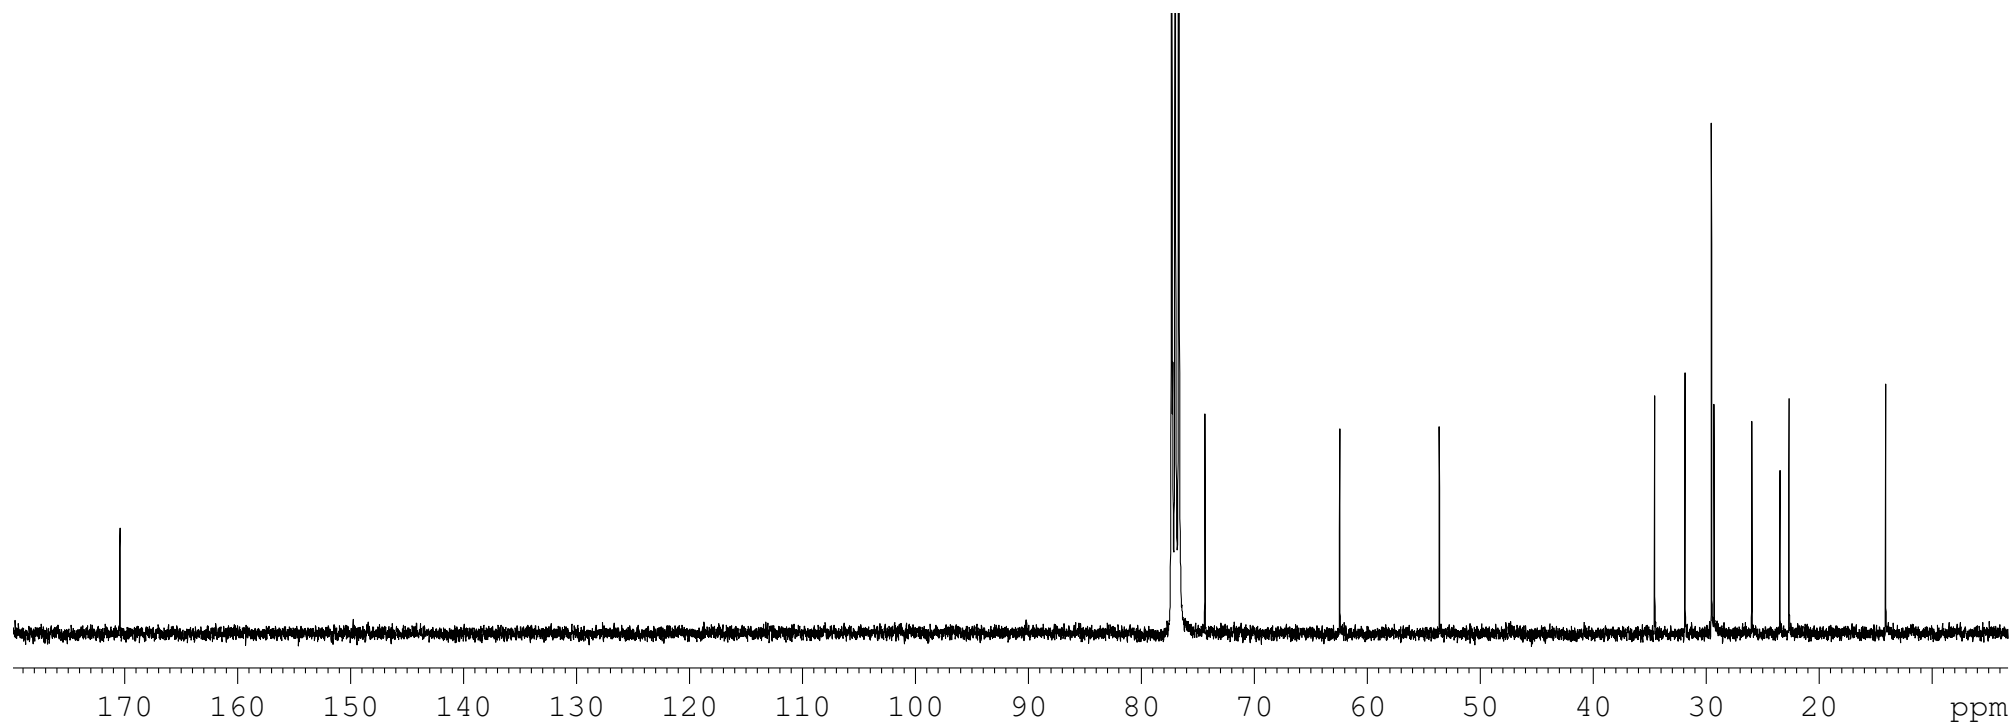

Supplement: c1ob06060k.pdf [file c1ob06060k.pdf]
